# Supplementary material
Source: PubMed Central journal article supplement (PMC2668543)
Supplement: NIHMS98094-supplement-01.pdf [file NIHMS98094-supplement-01.pdf]

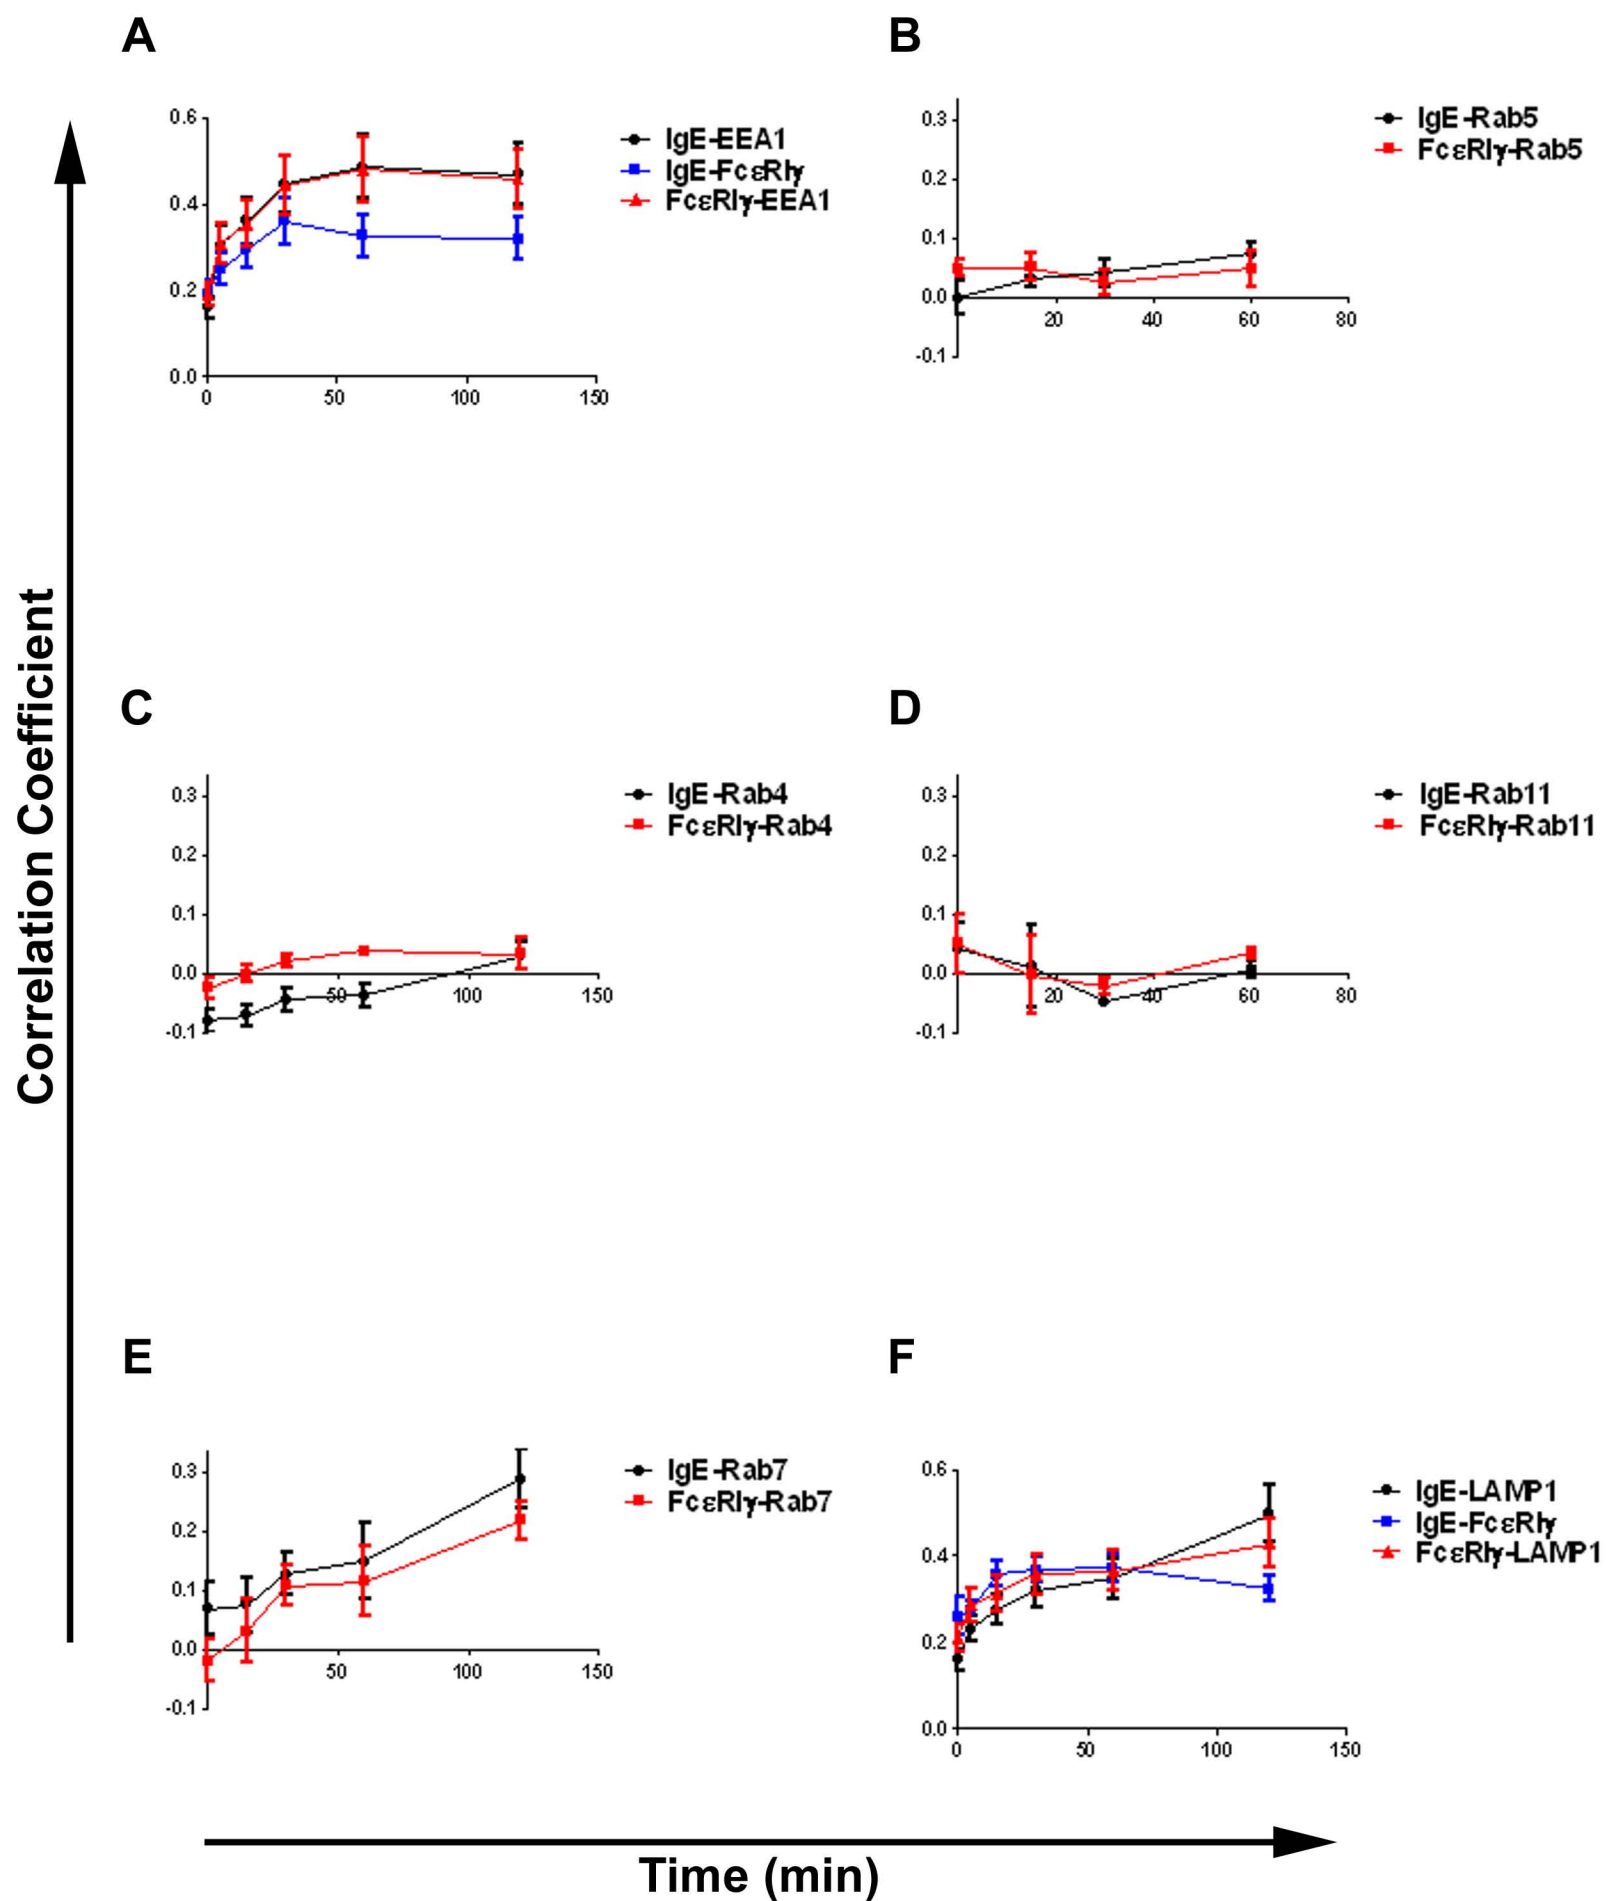

**Figure S1**

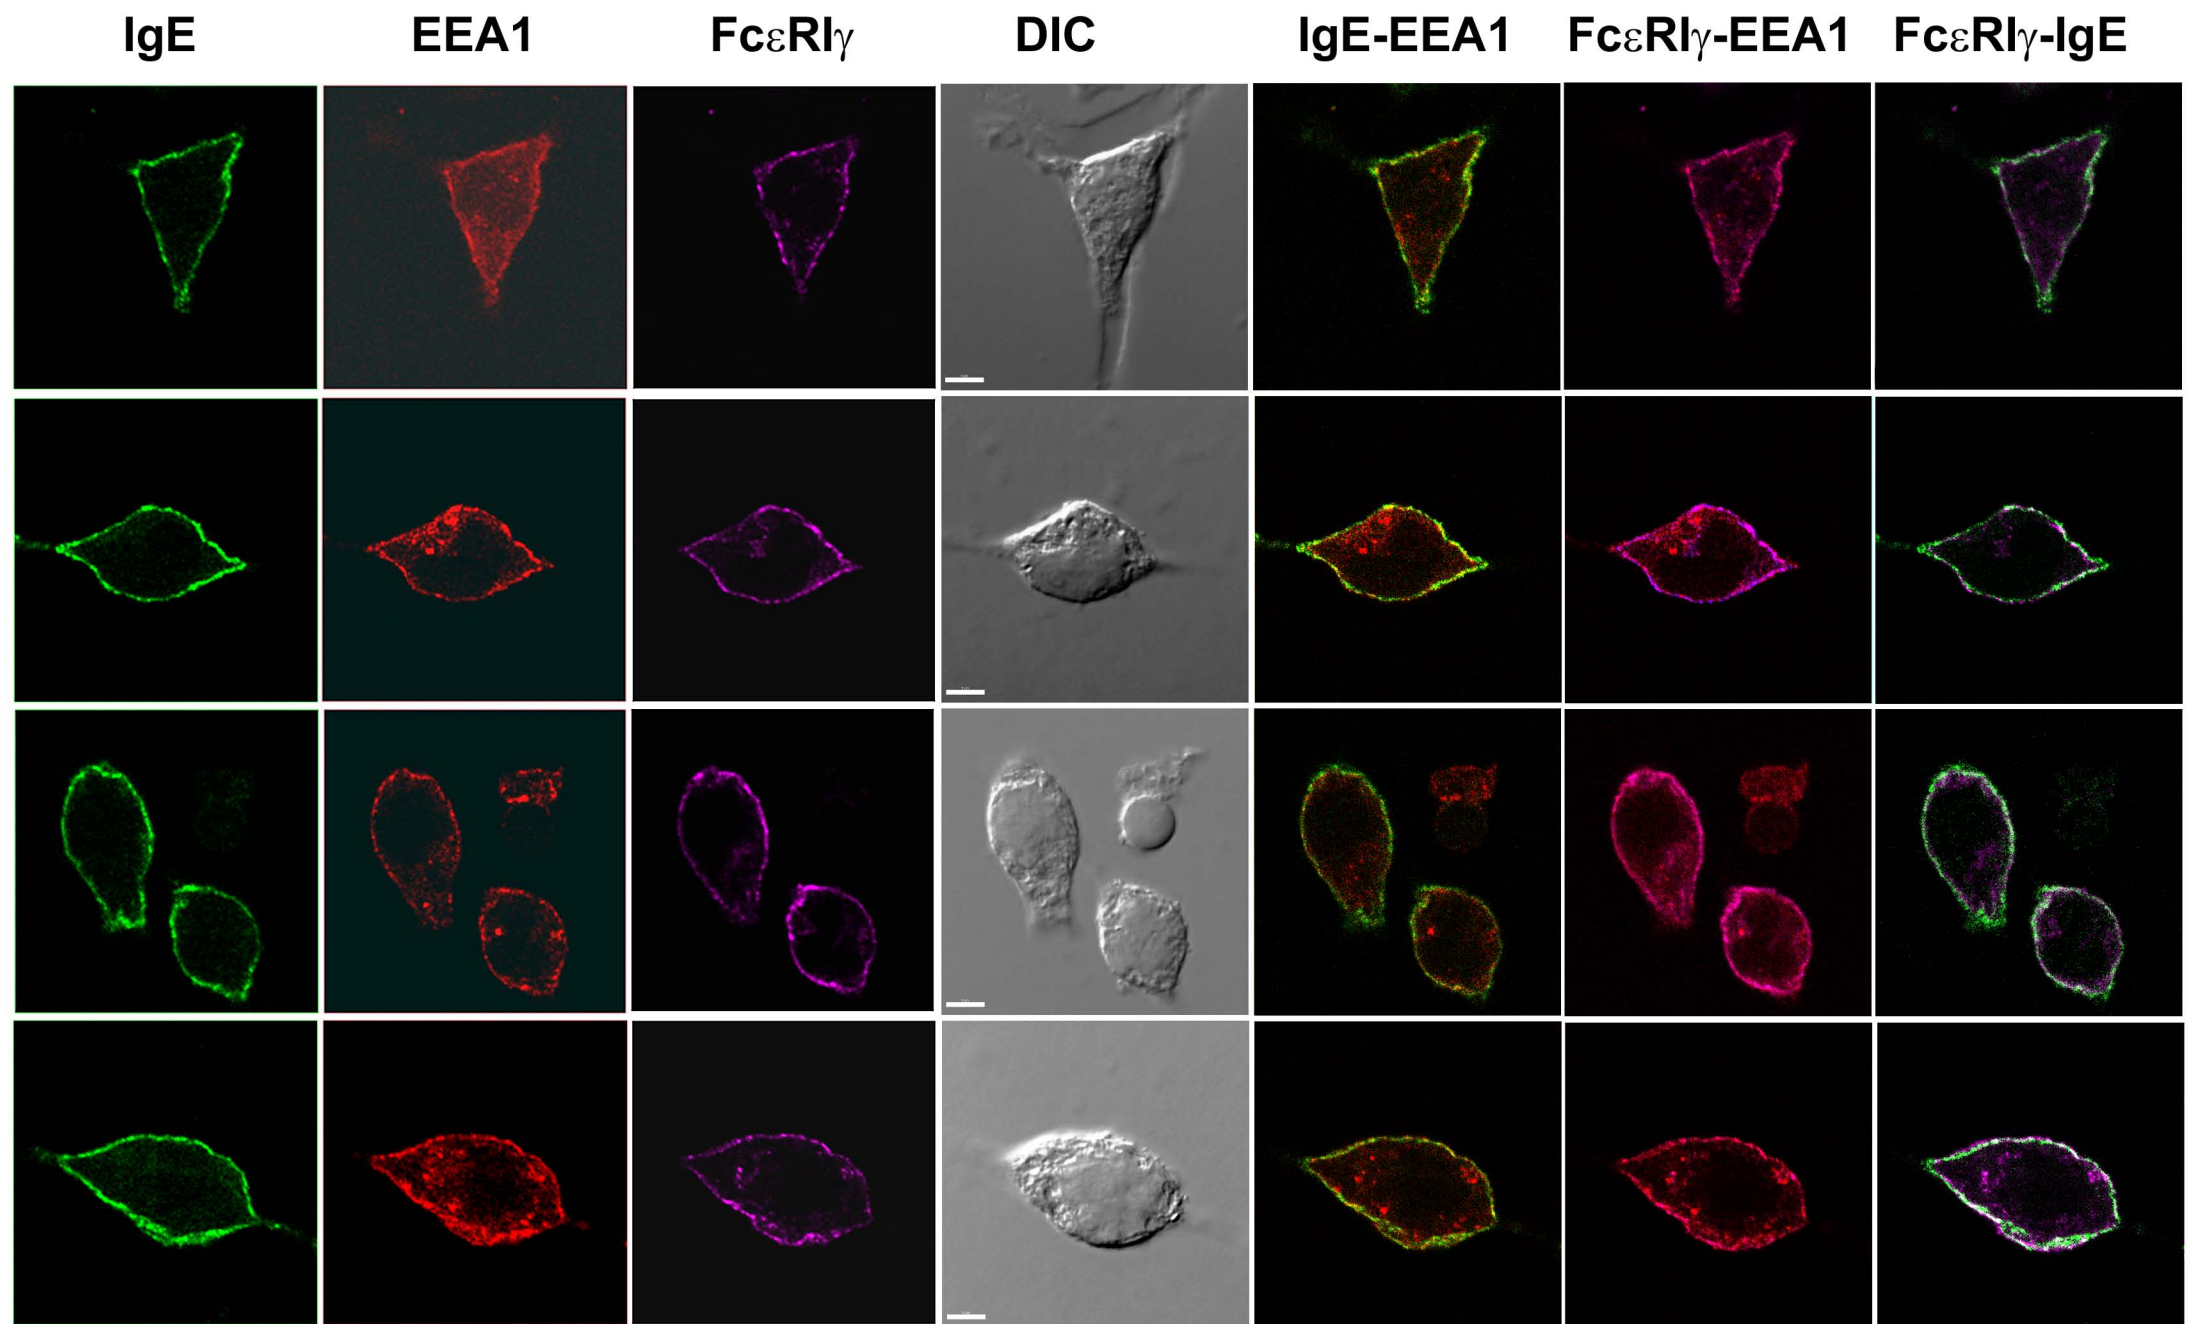

0 min

Figure S2A

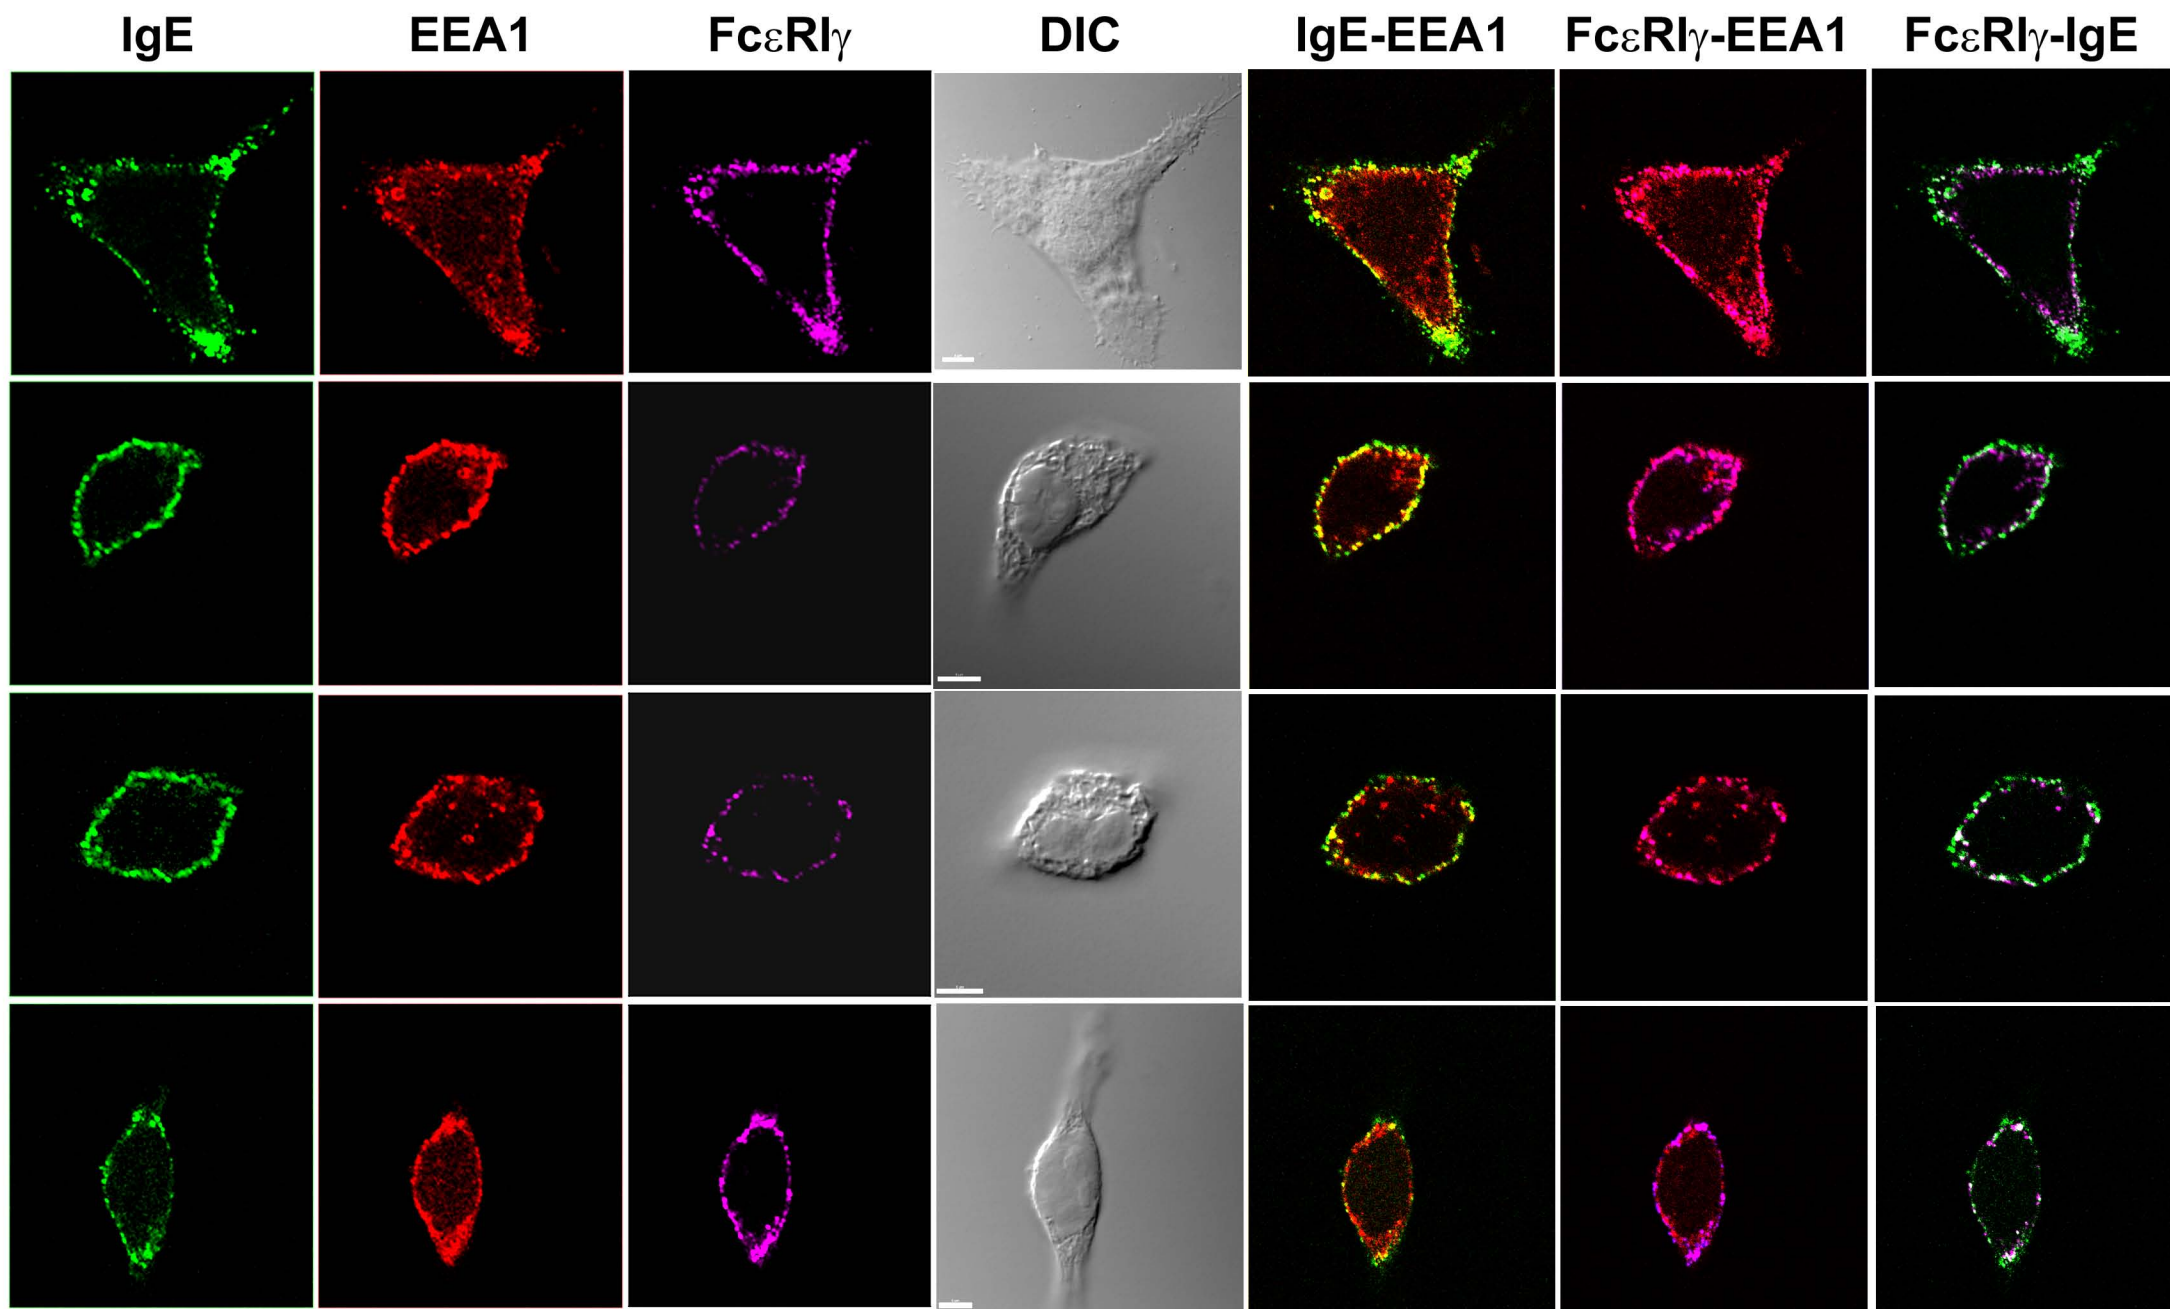

15 min

Figure S2B



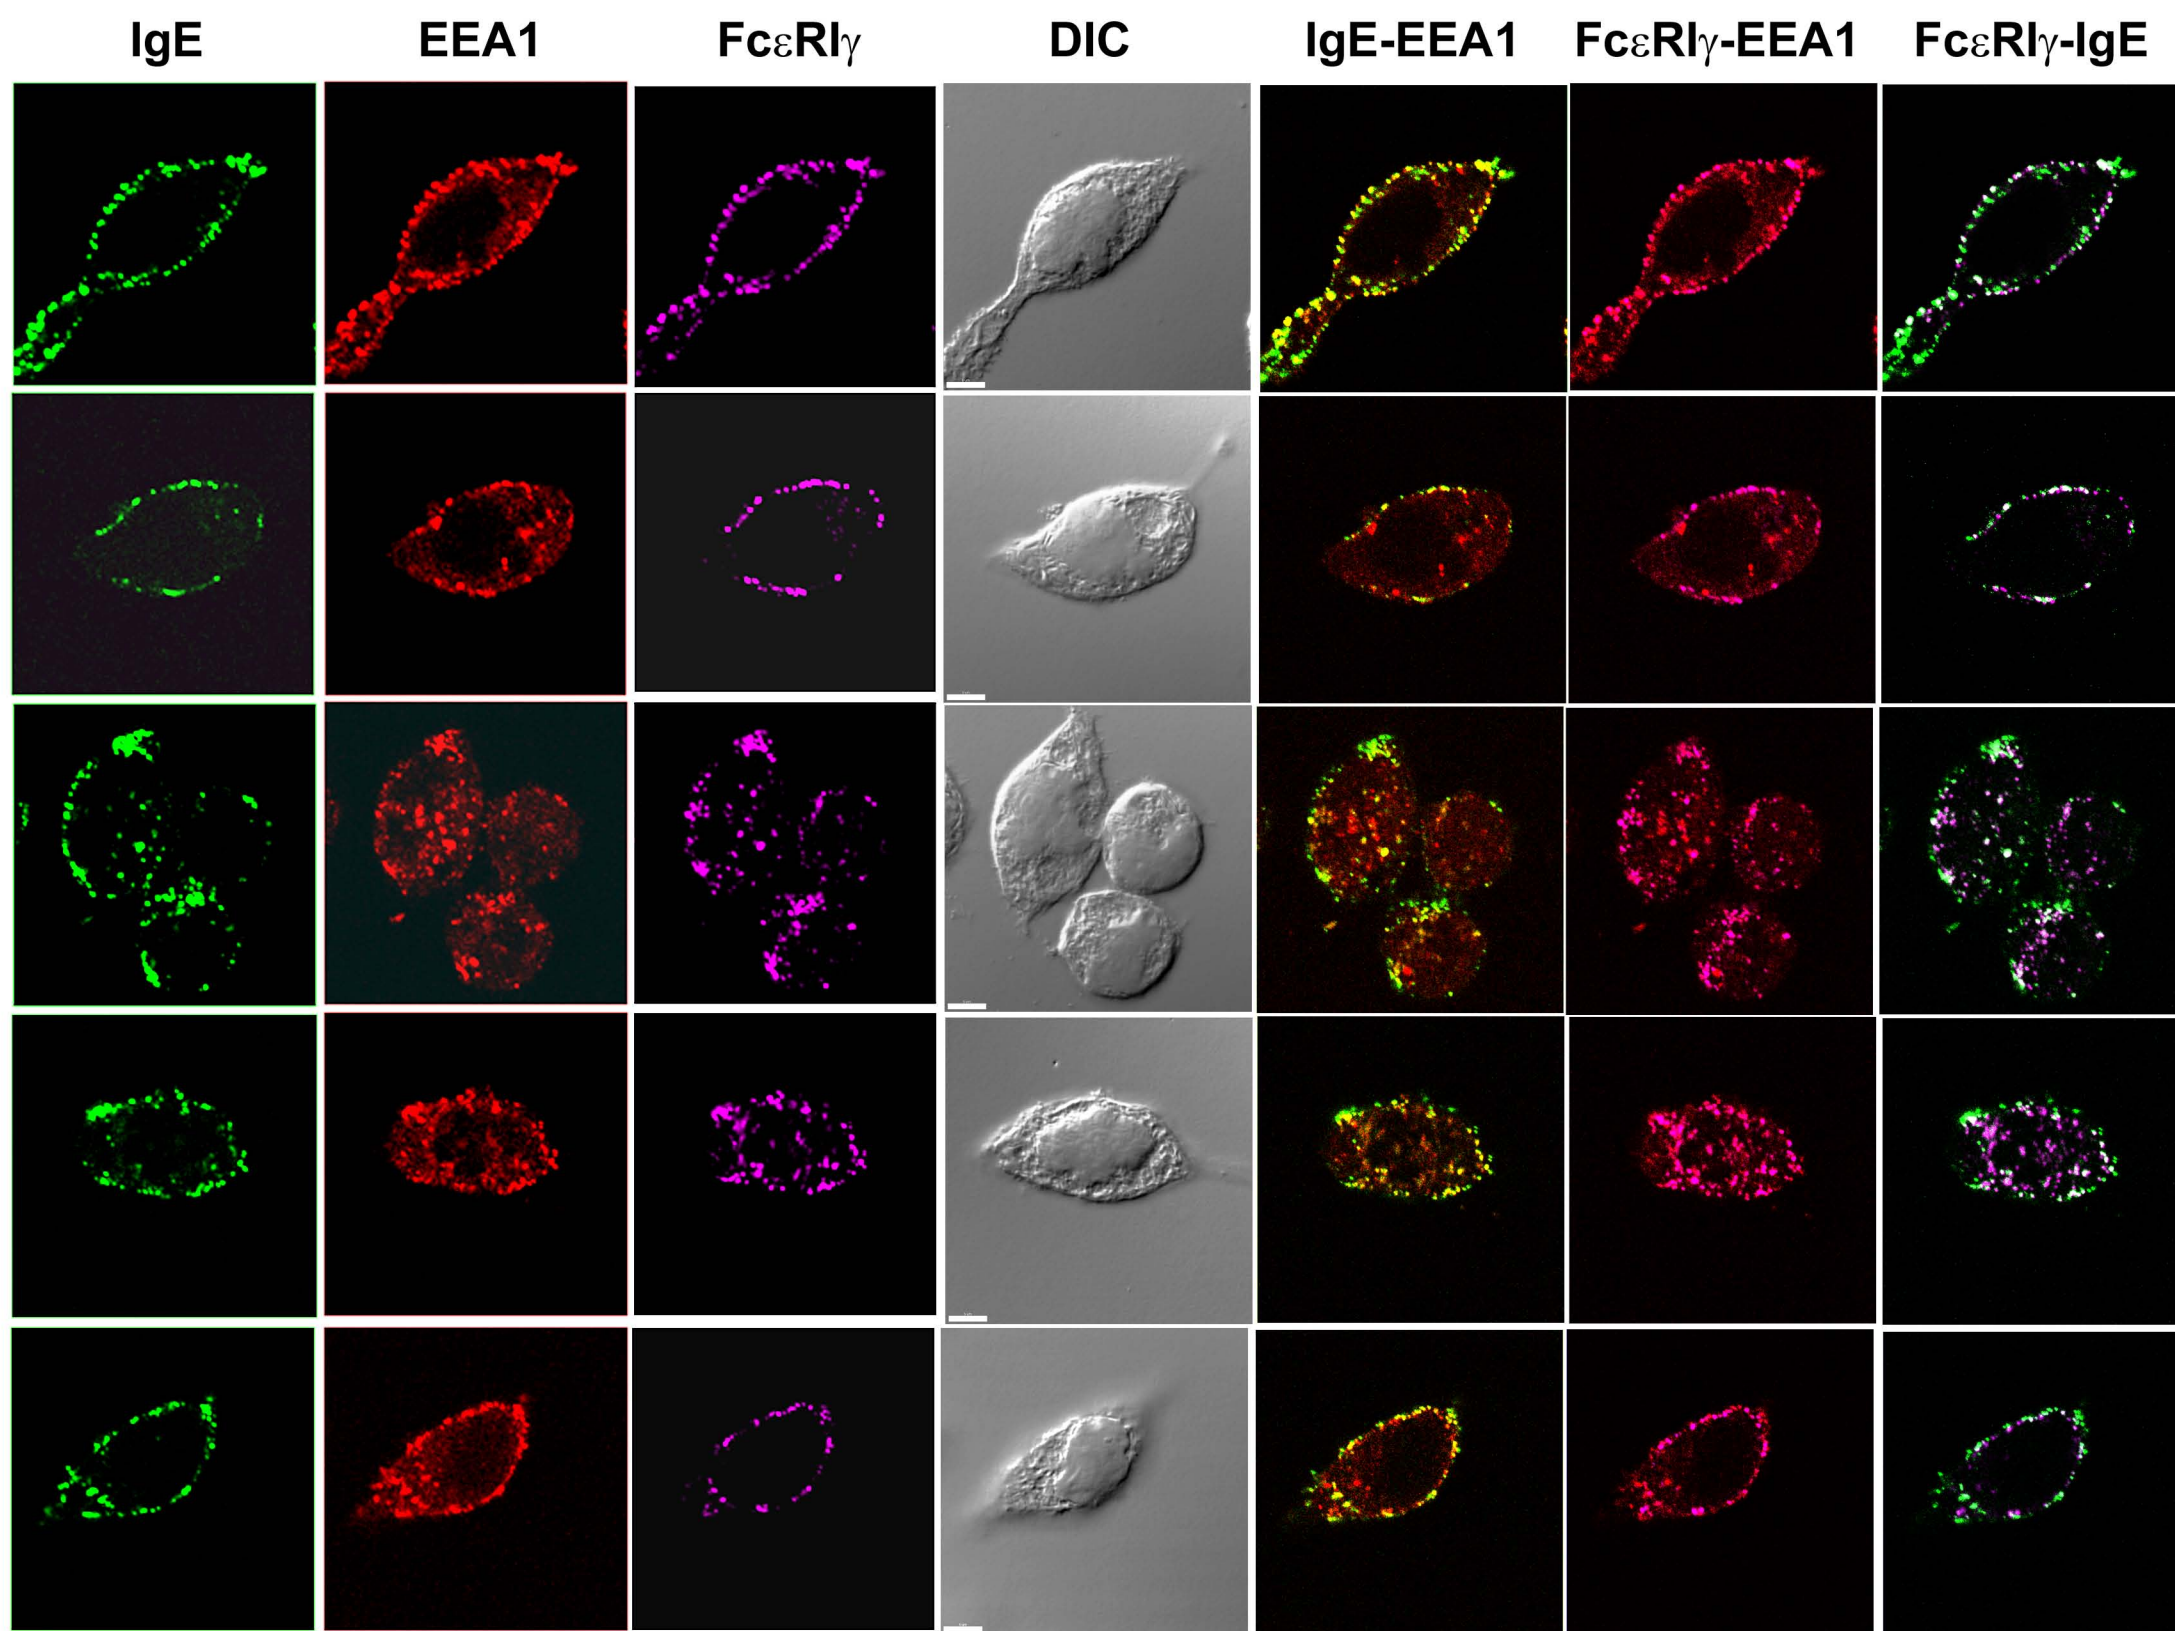

30 min

Figure S2C

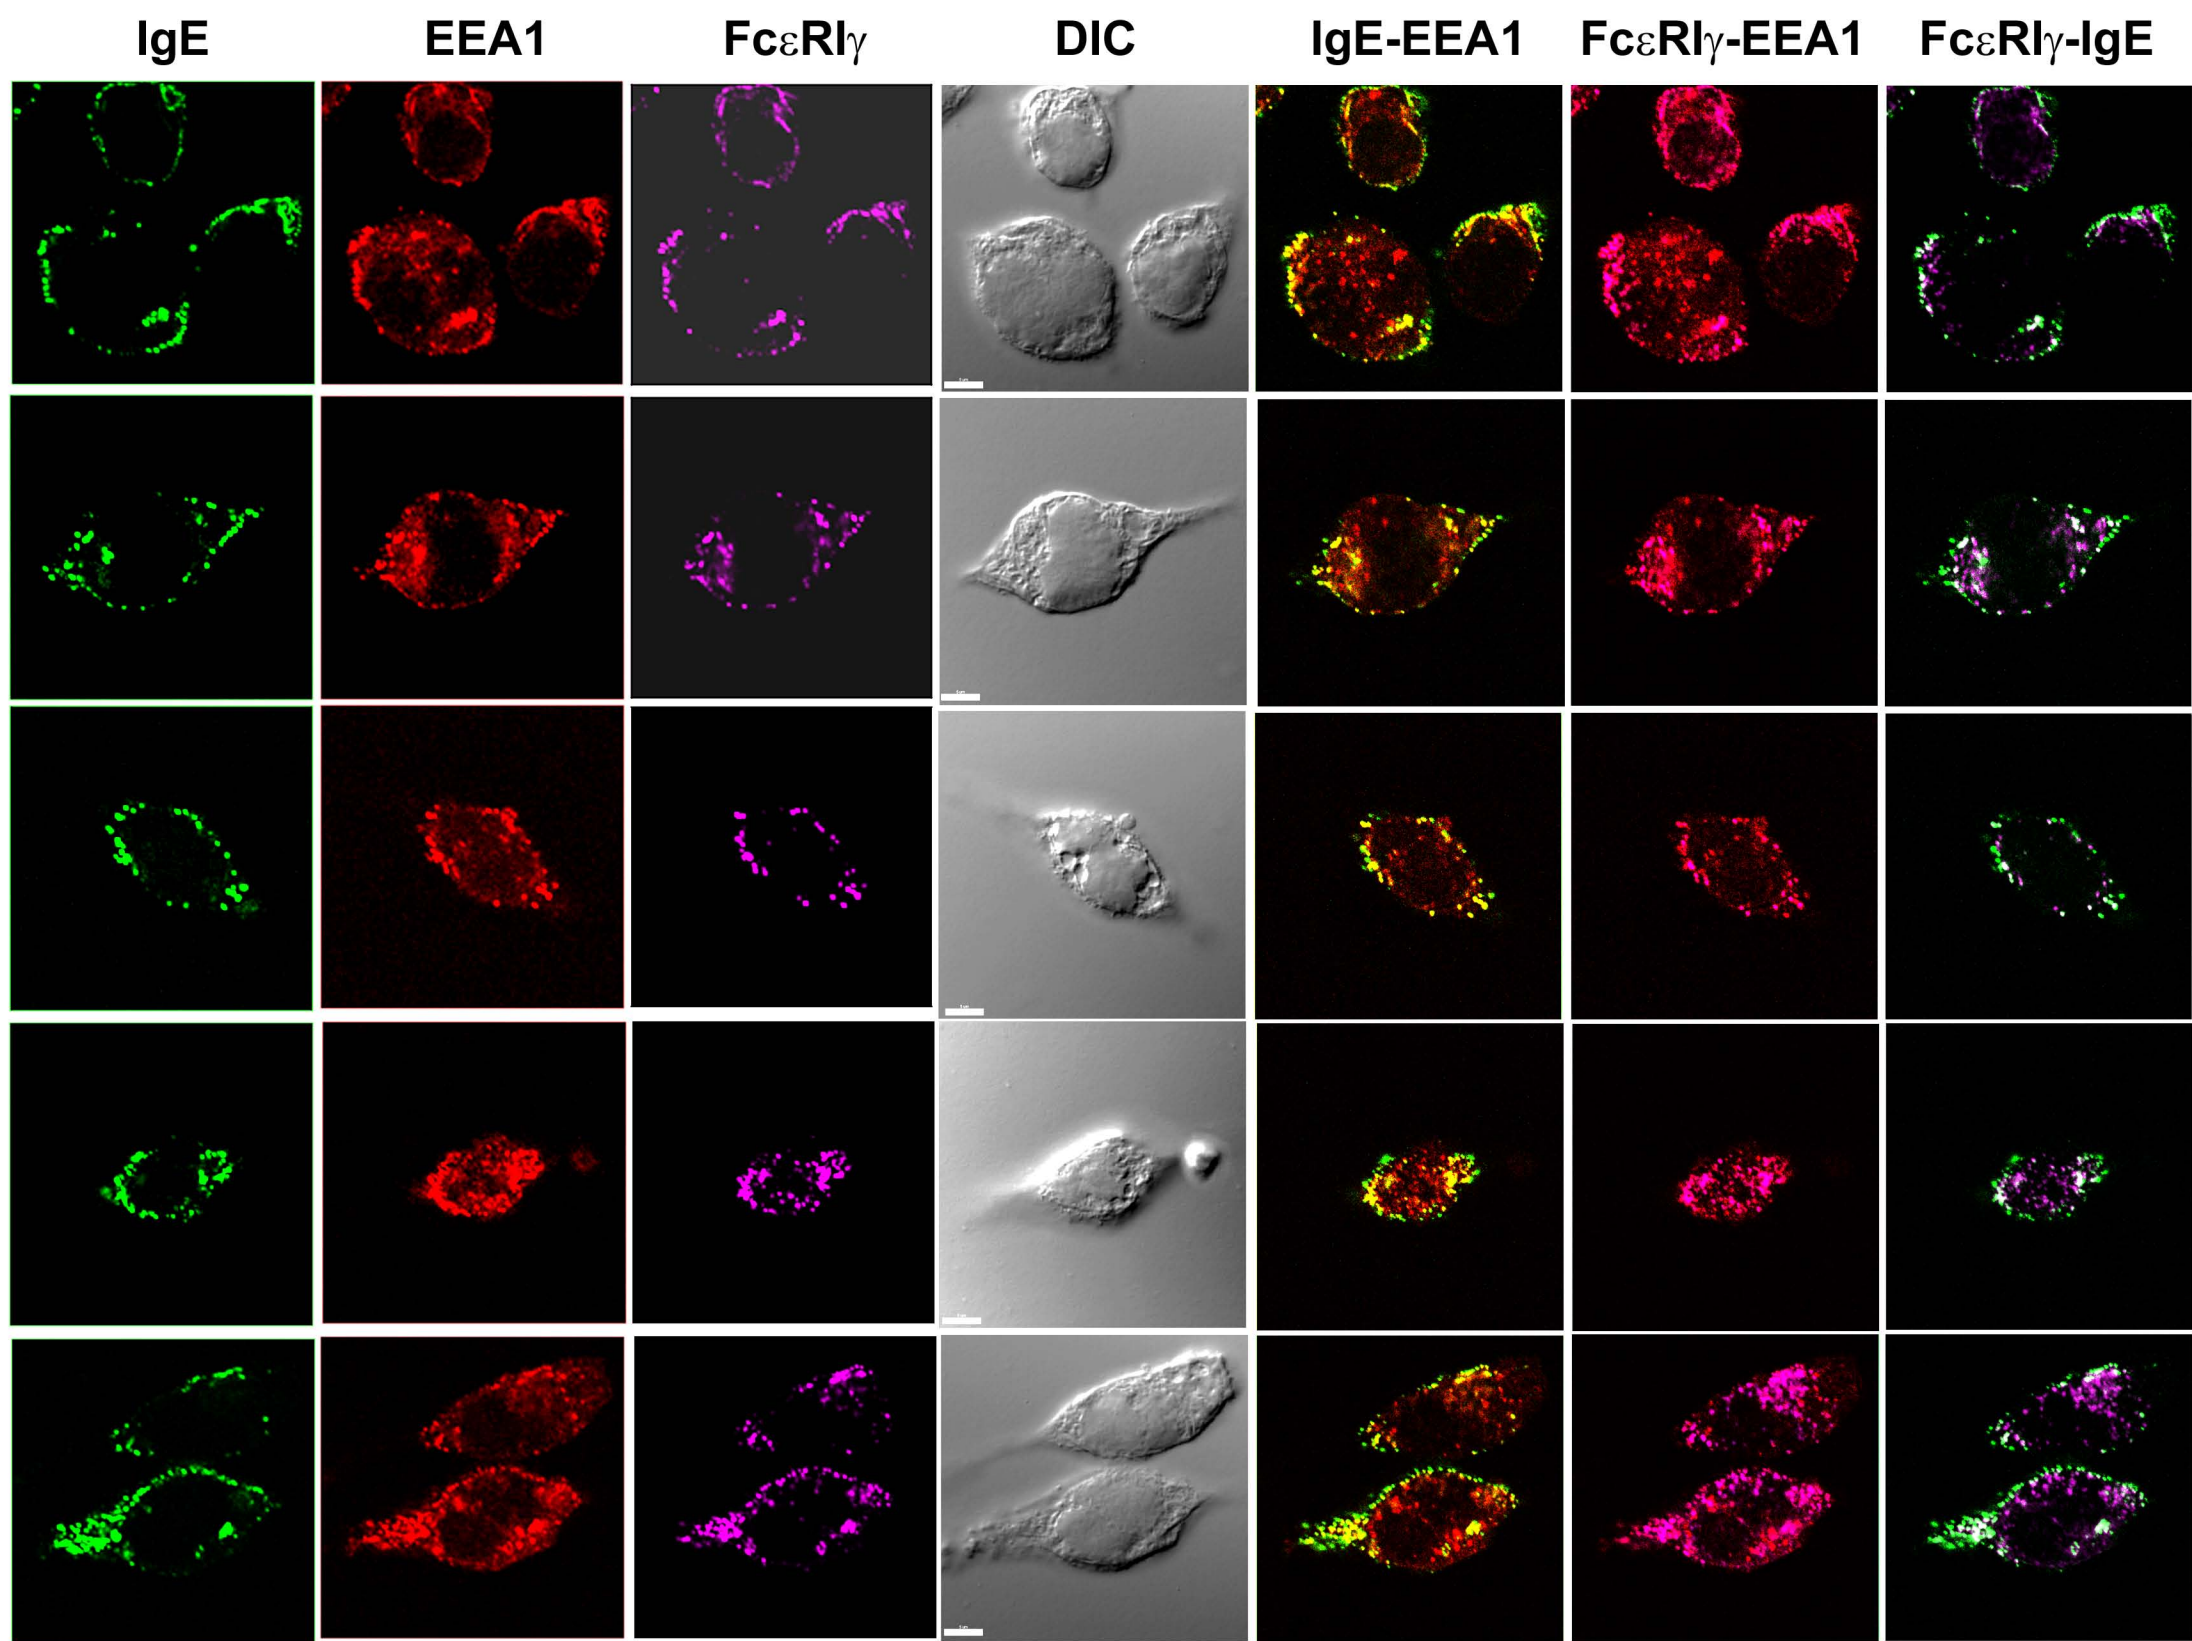

60 min

Figure S2D



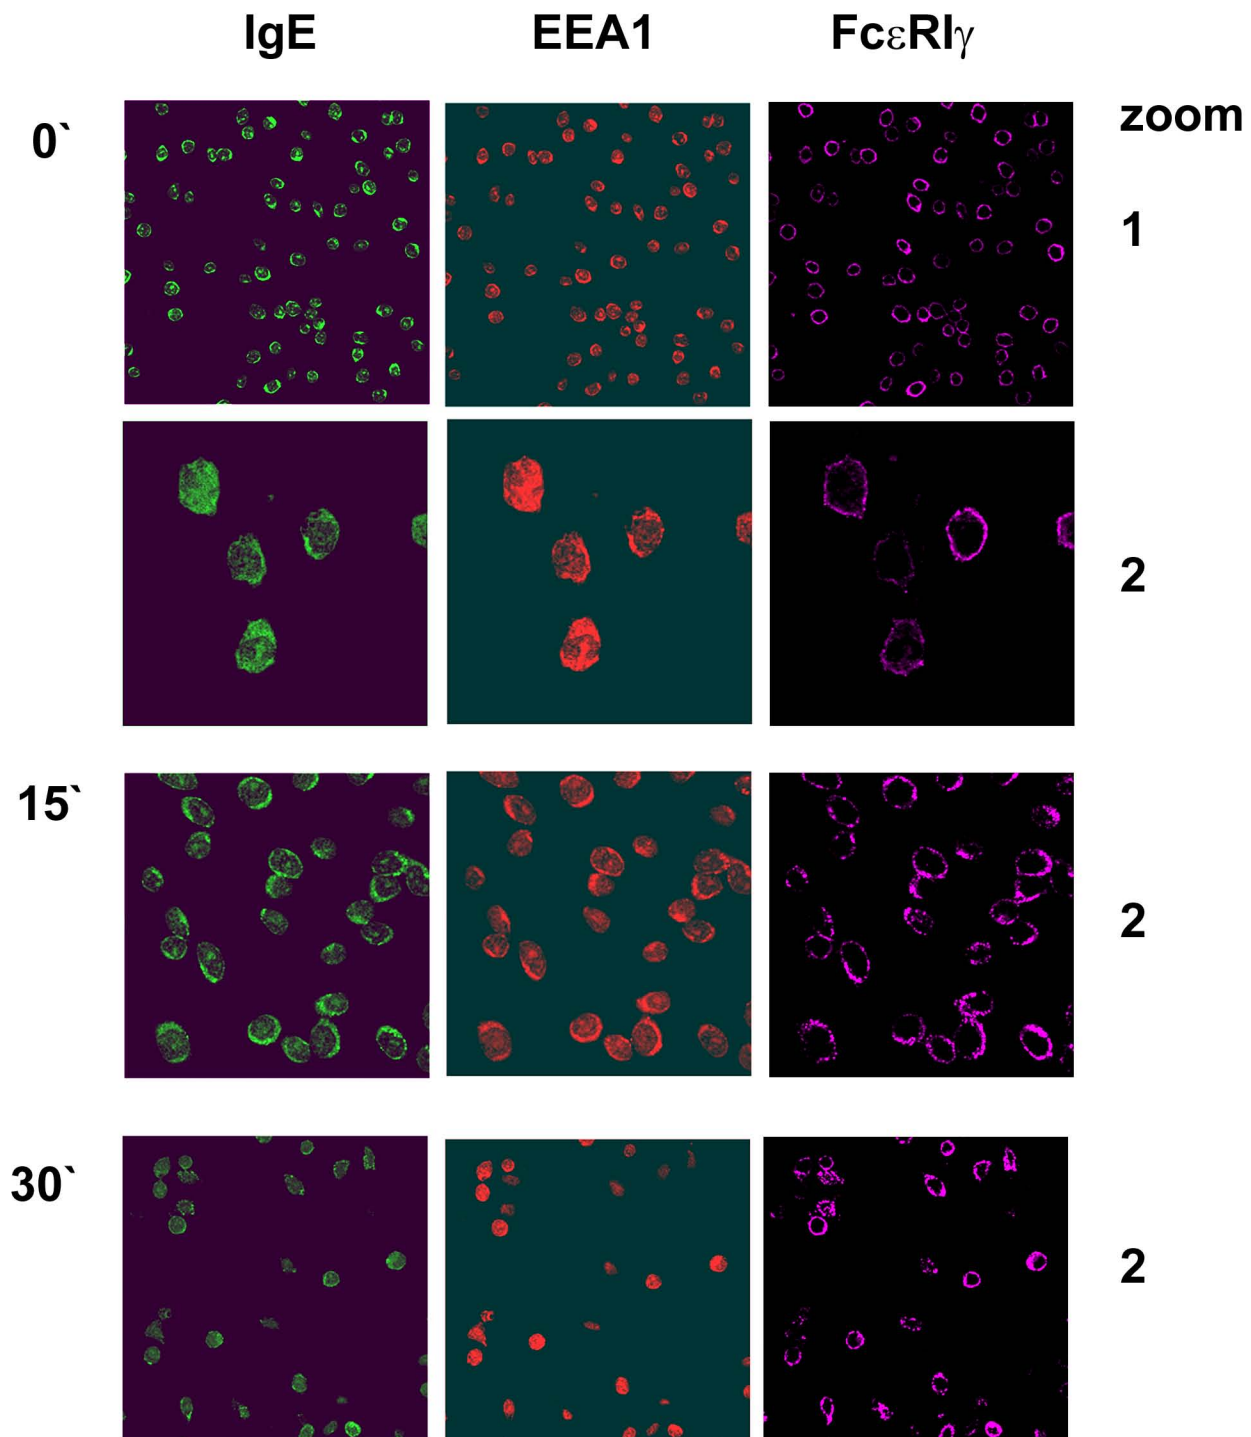

**Figure S2E**

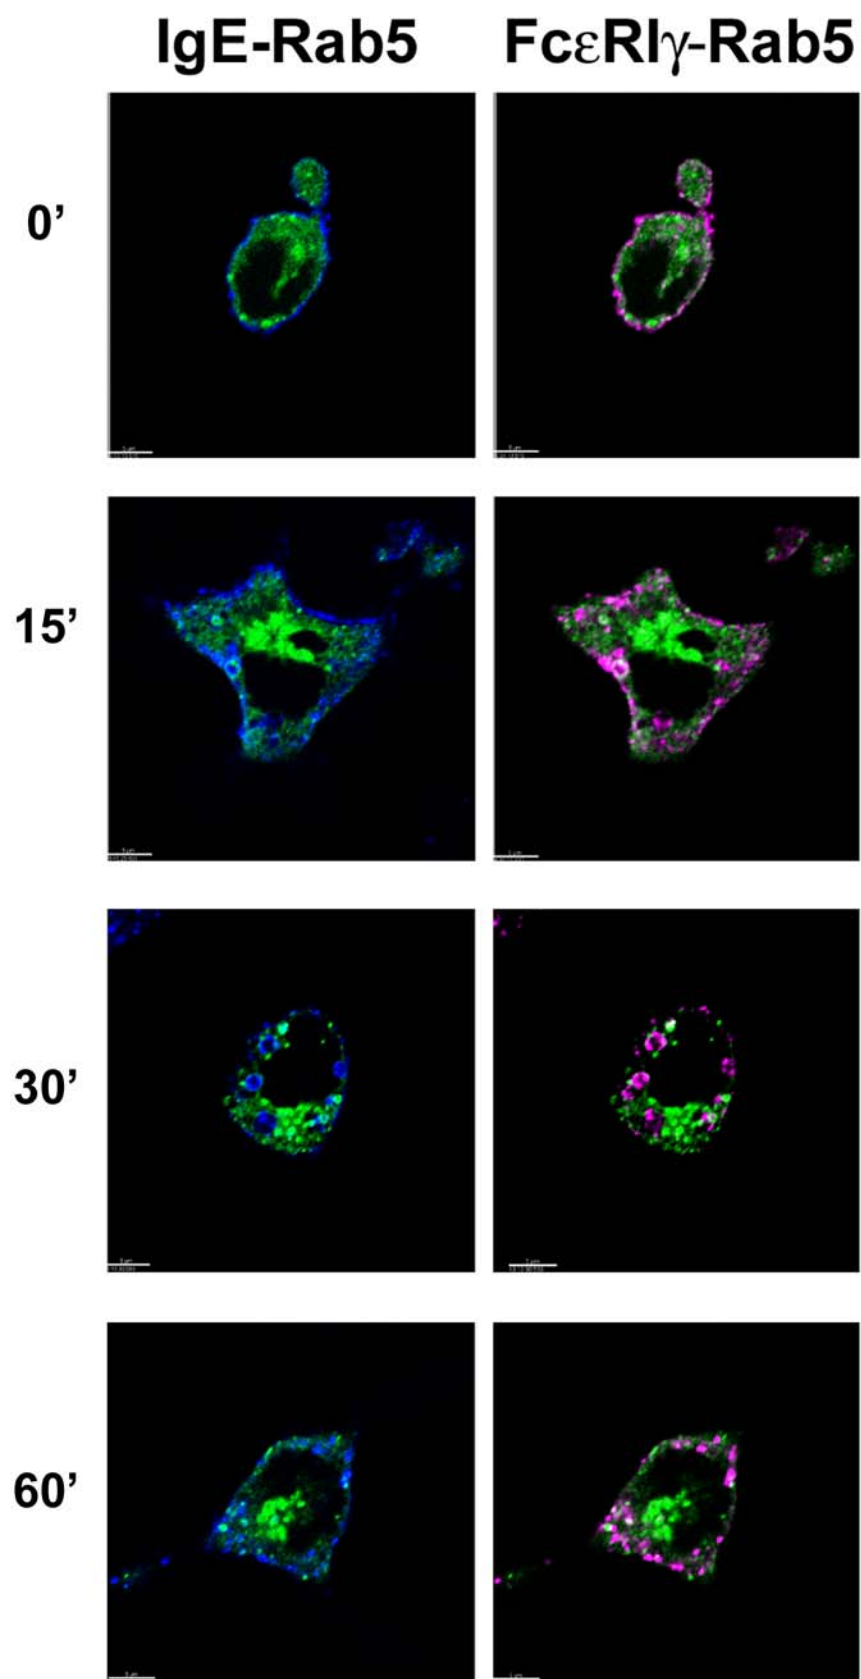

**Figure S3**

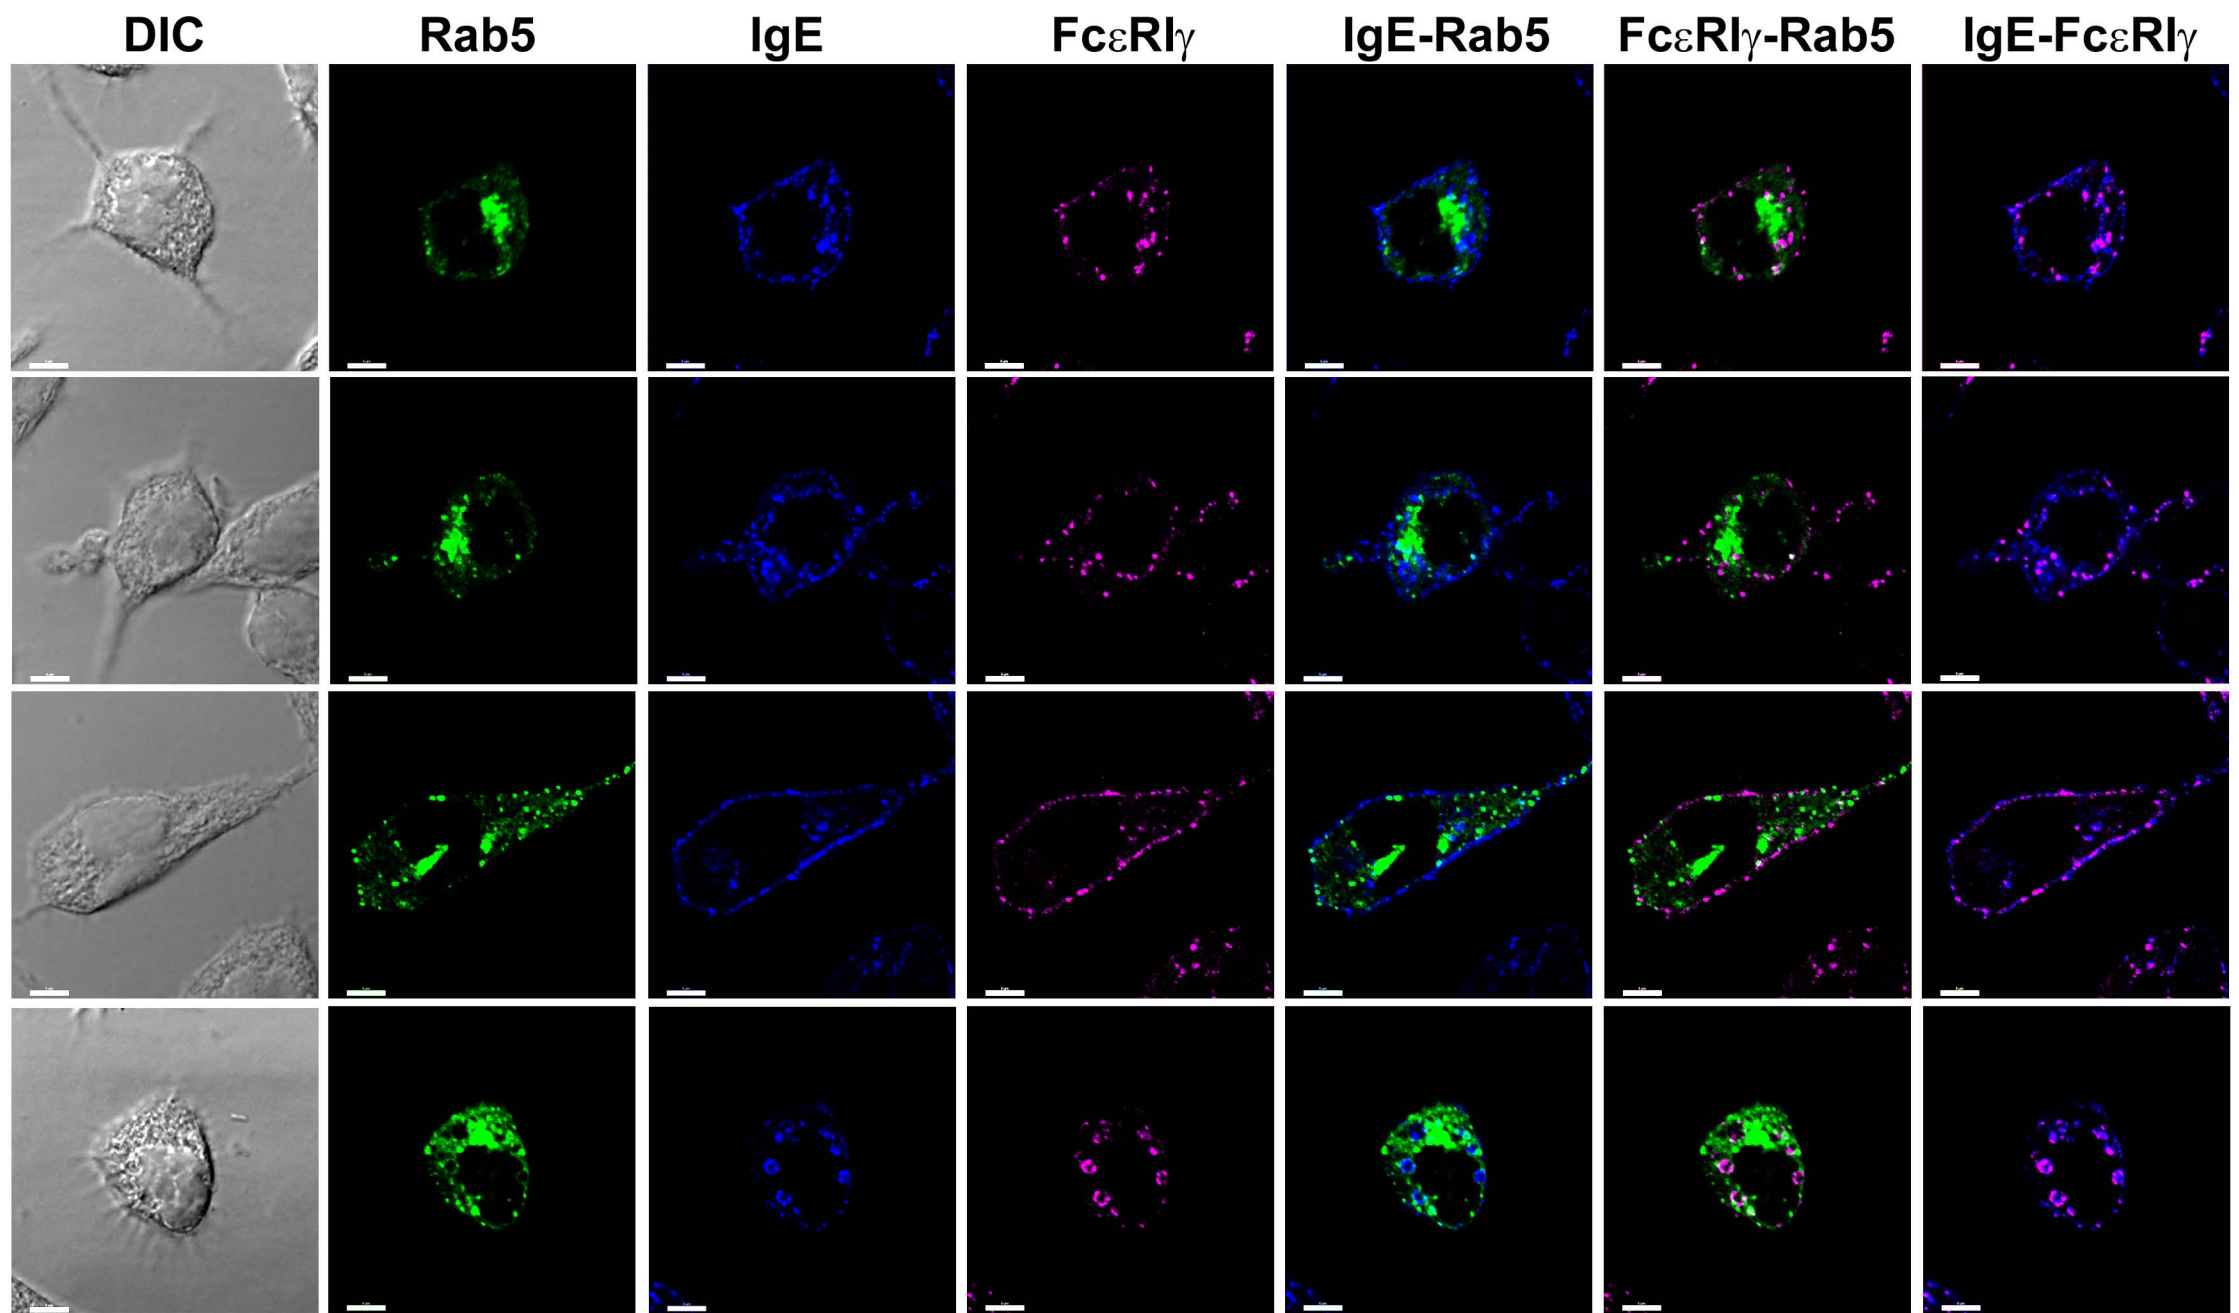

30 min

Figure S4A



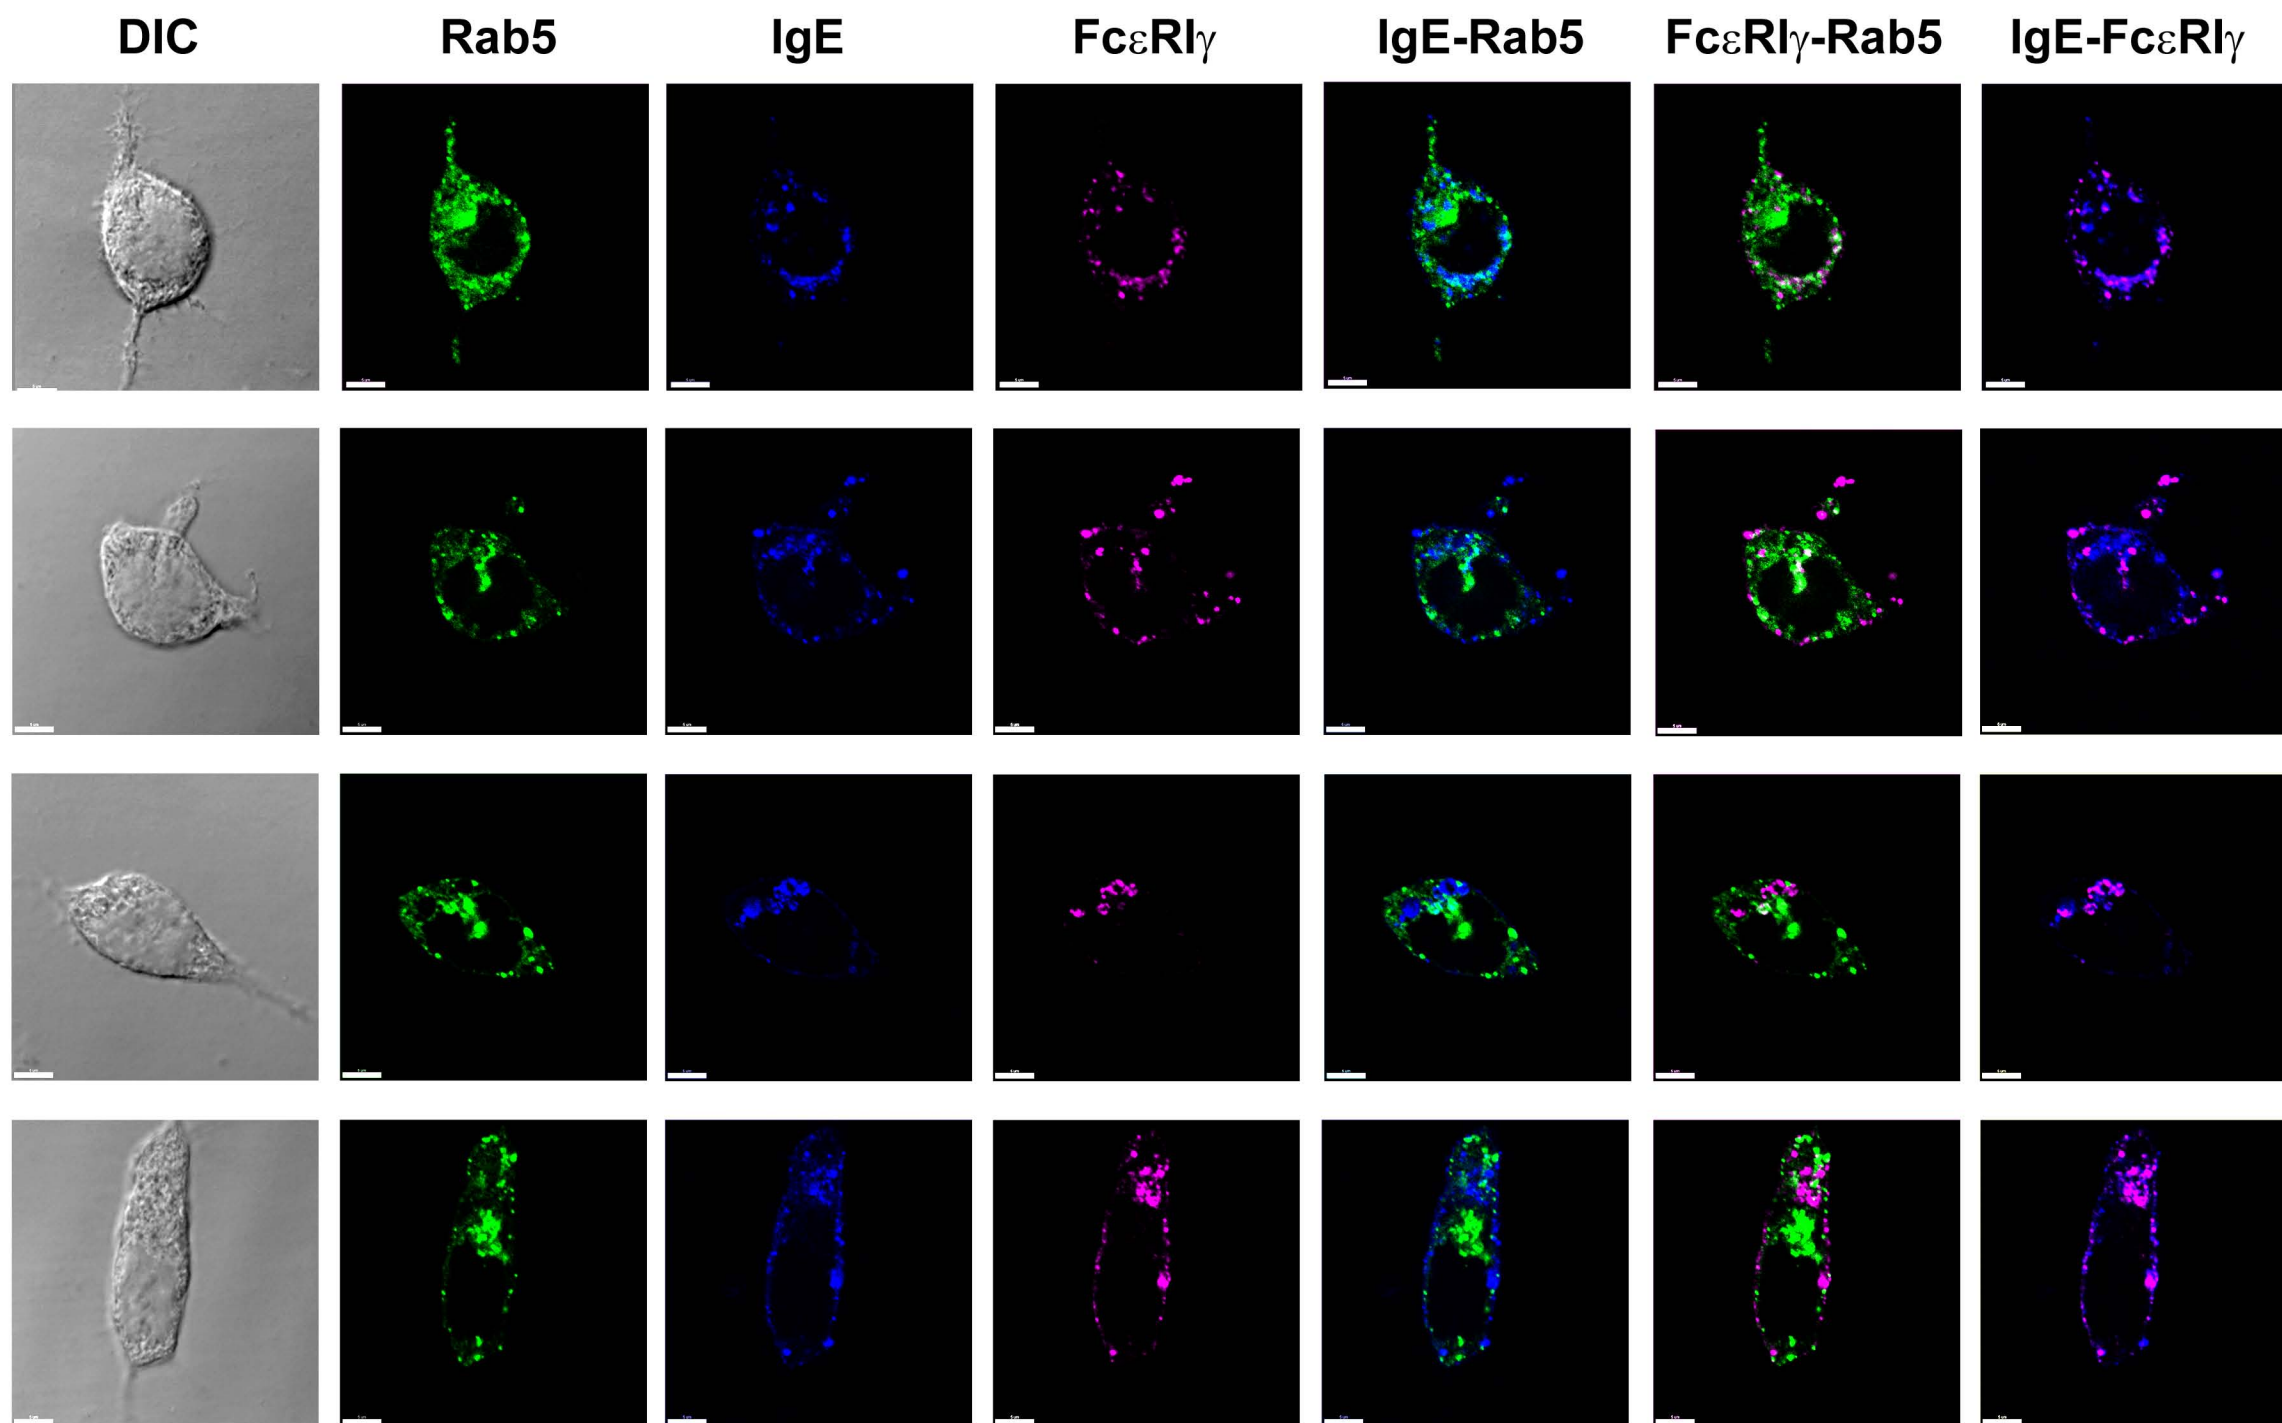

60 min

Figure S4B

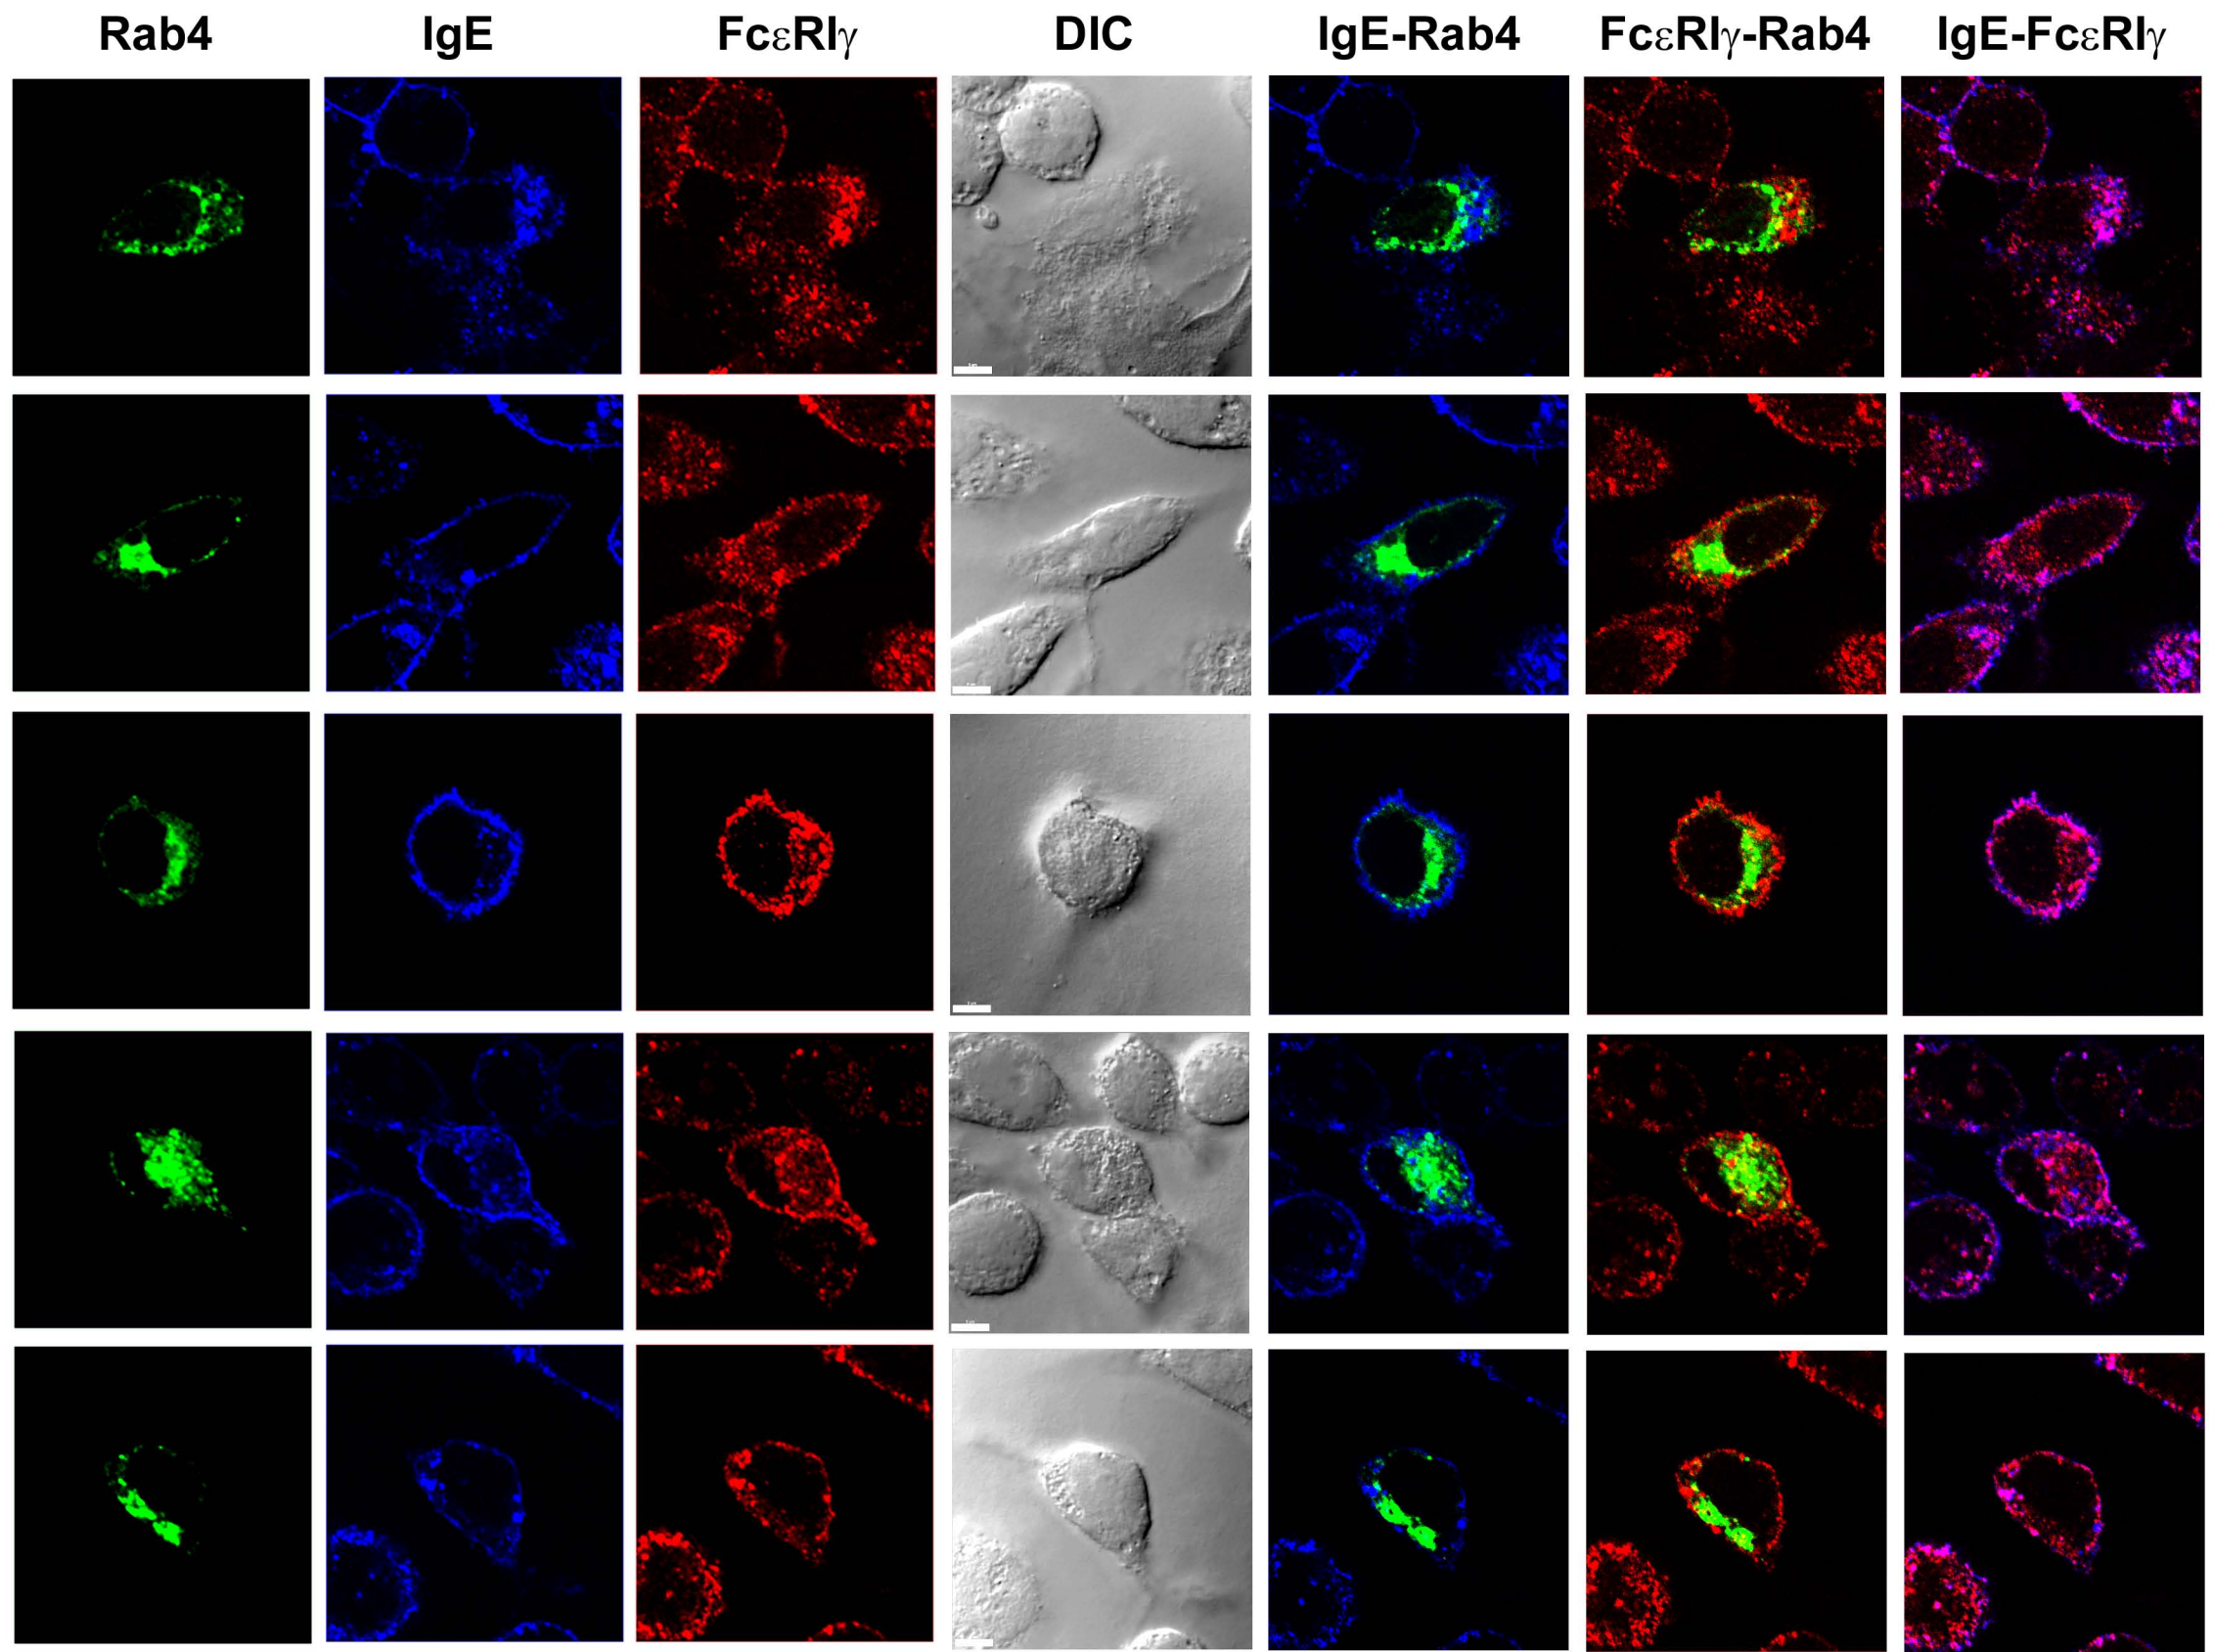

60 min

Figure S5A



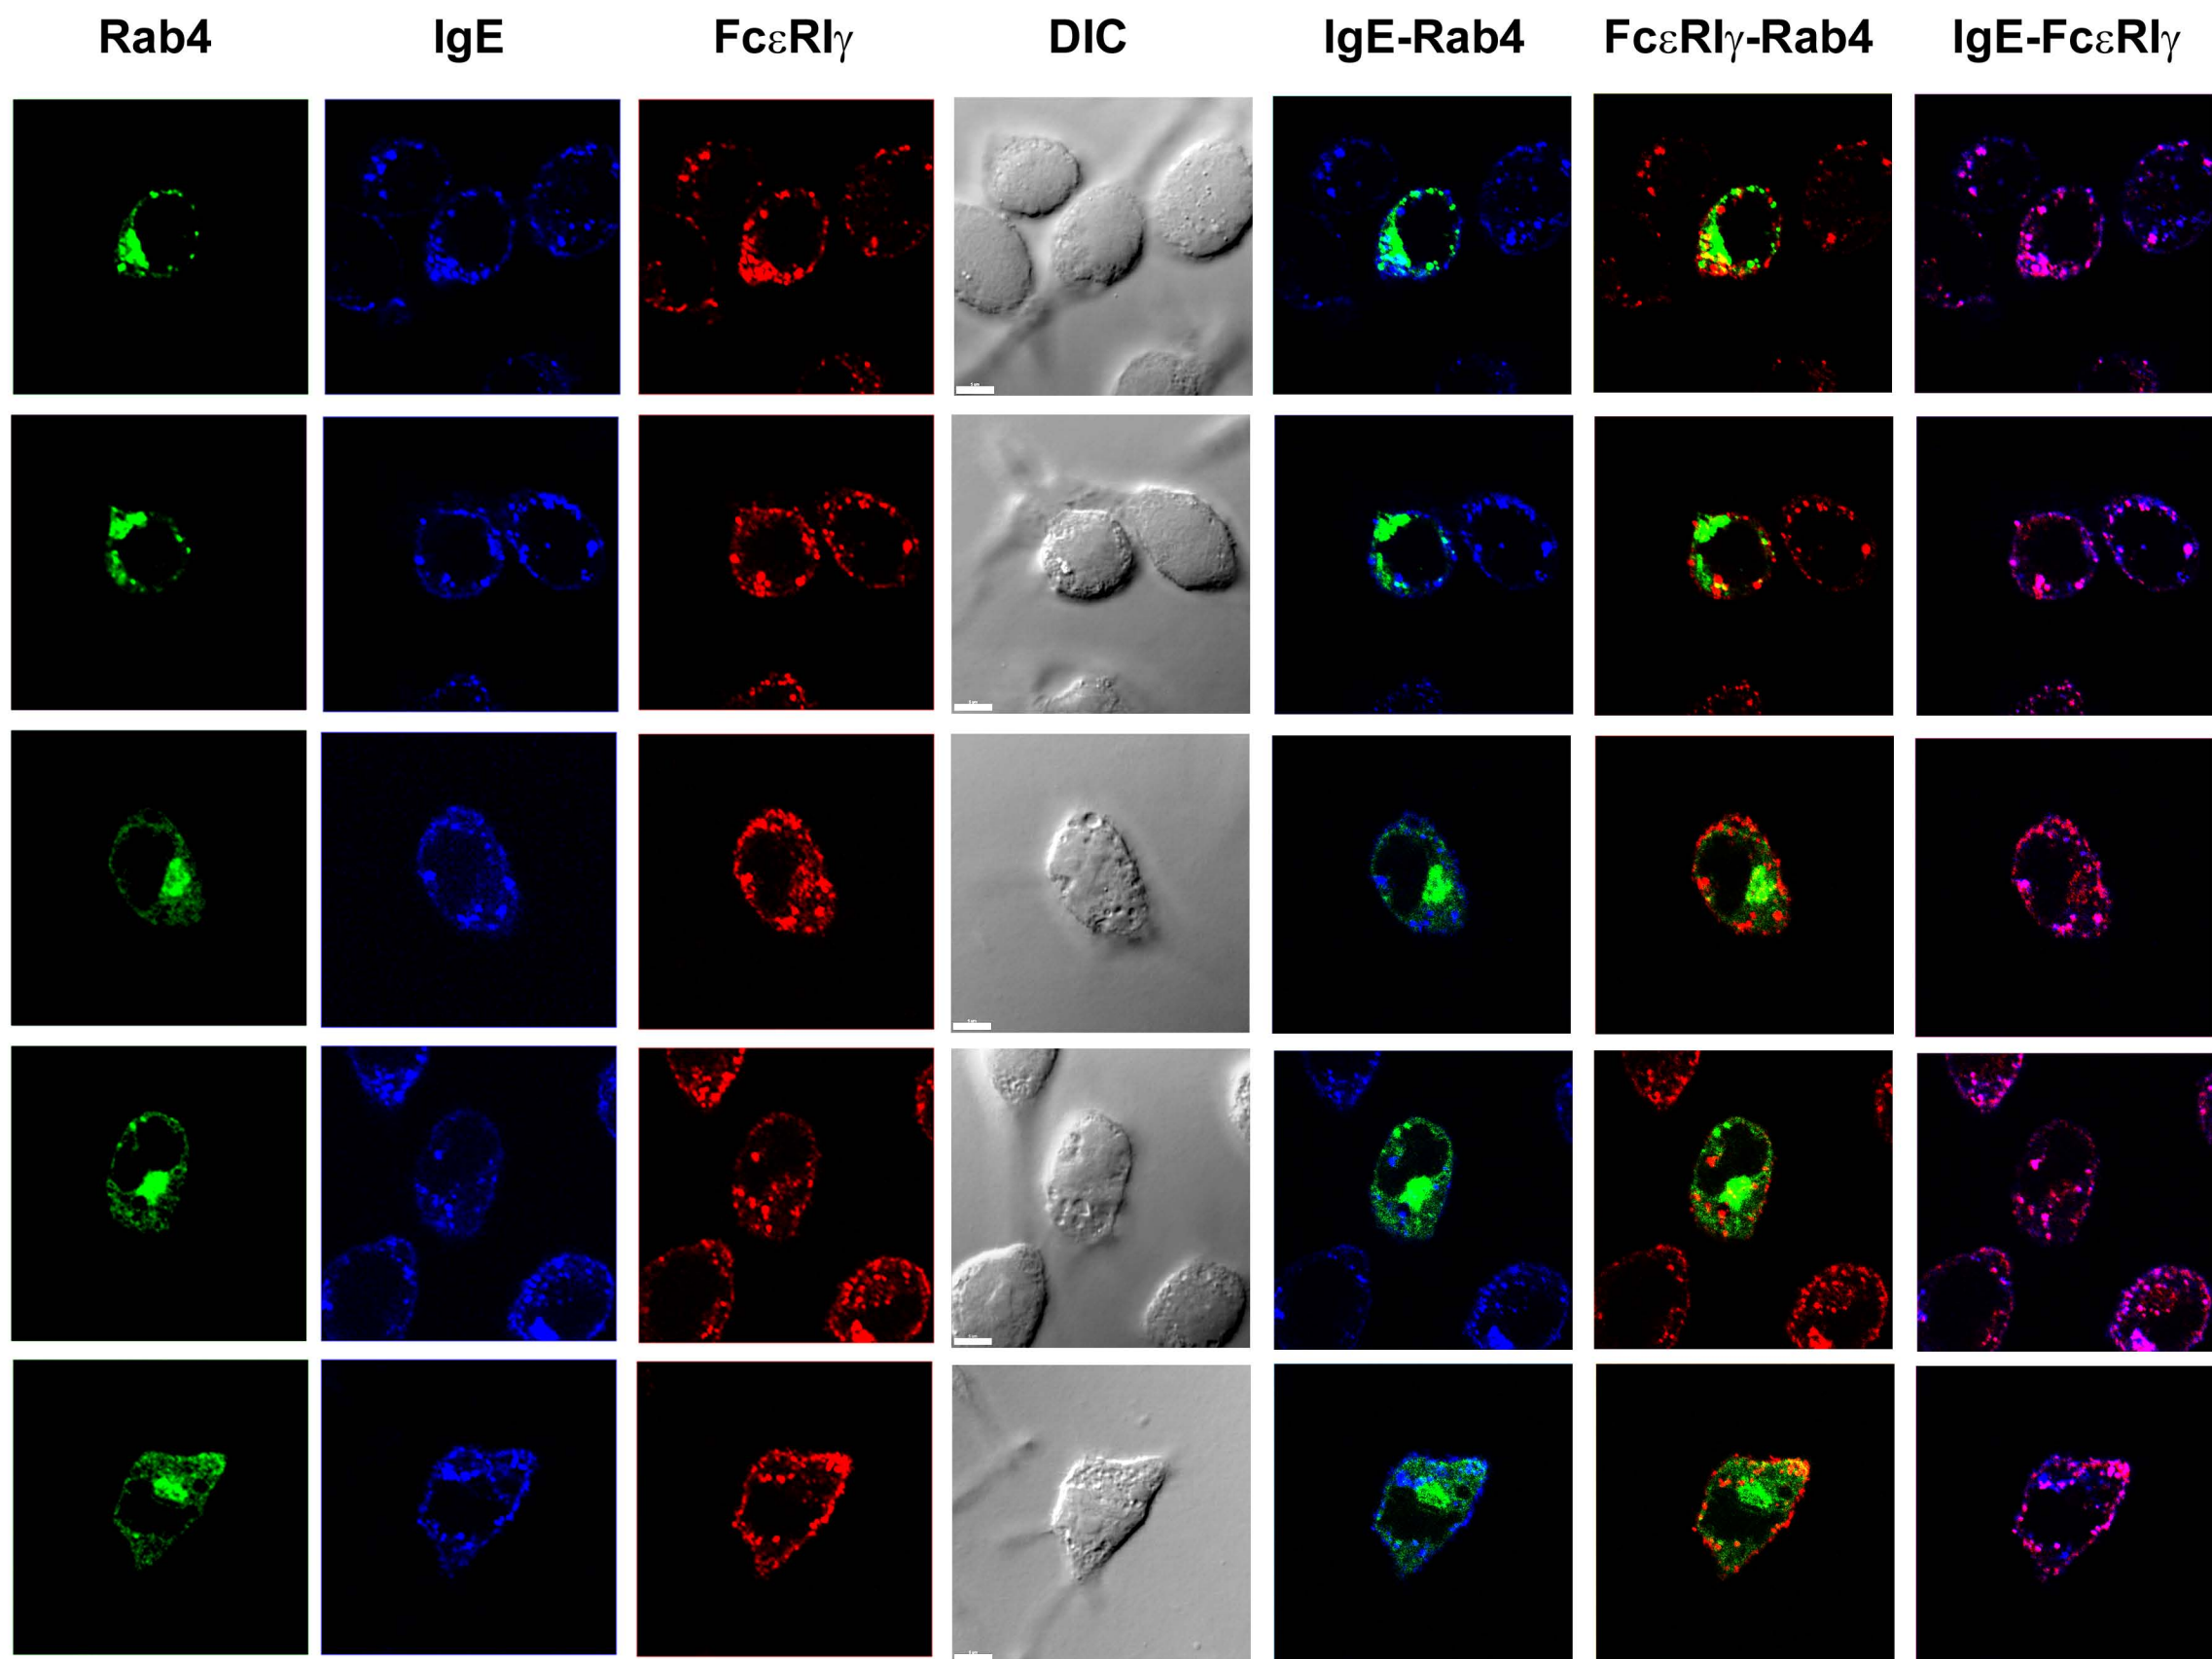

120 min

Figure S5B



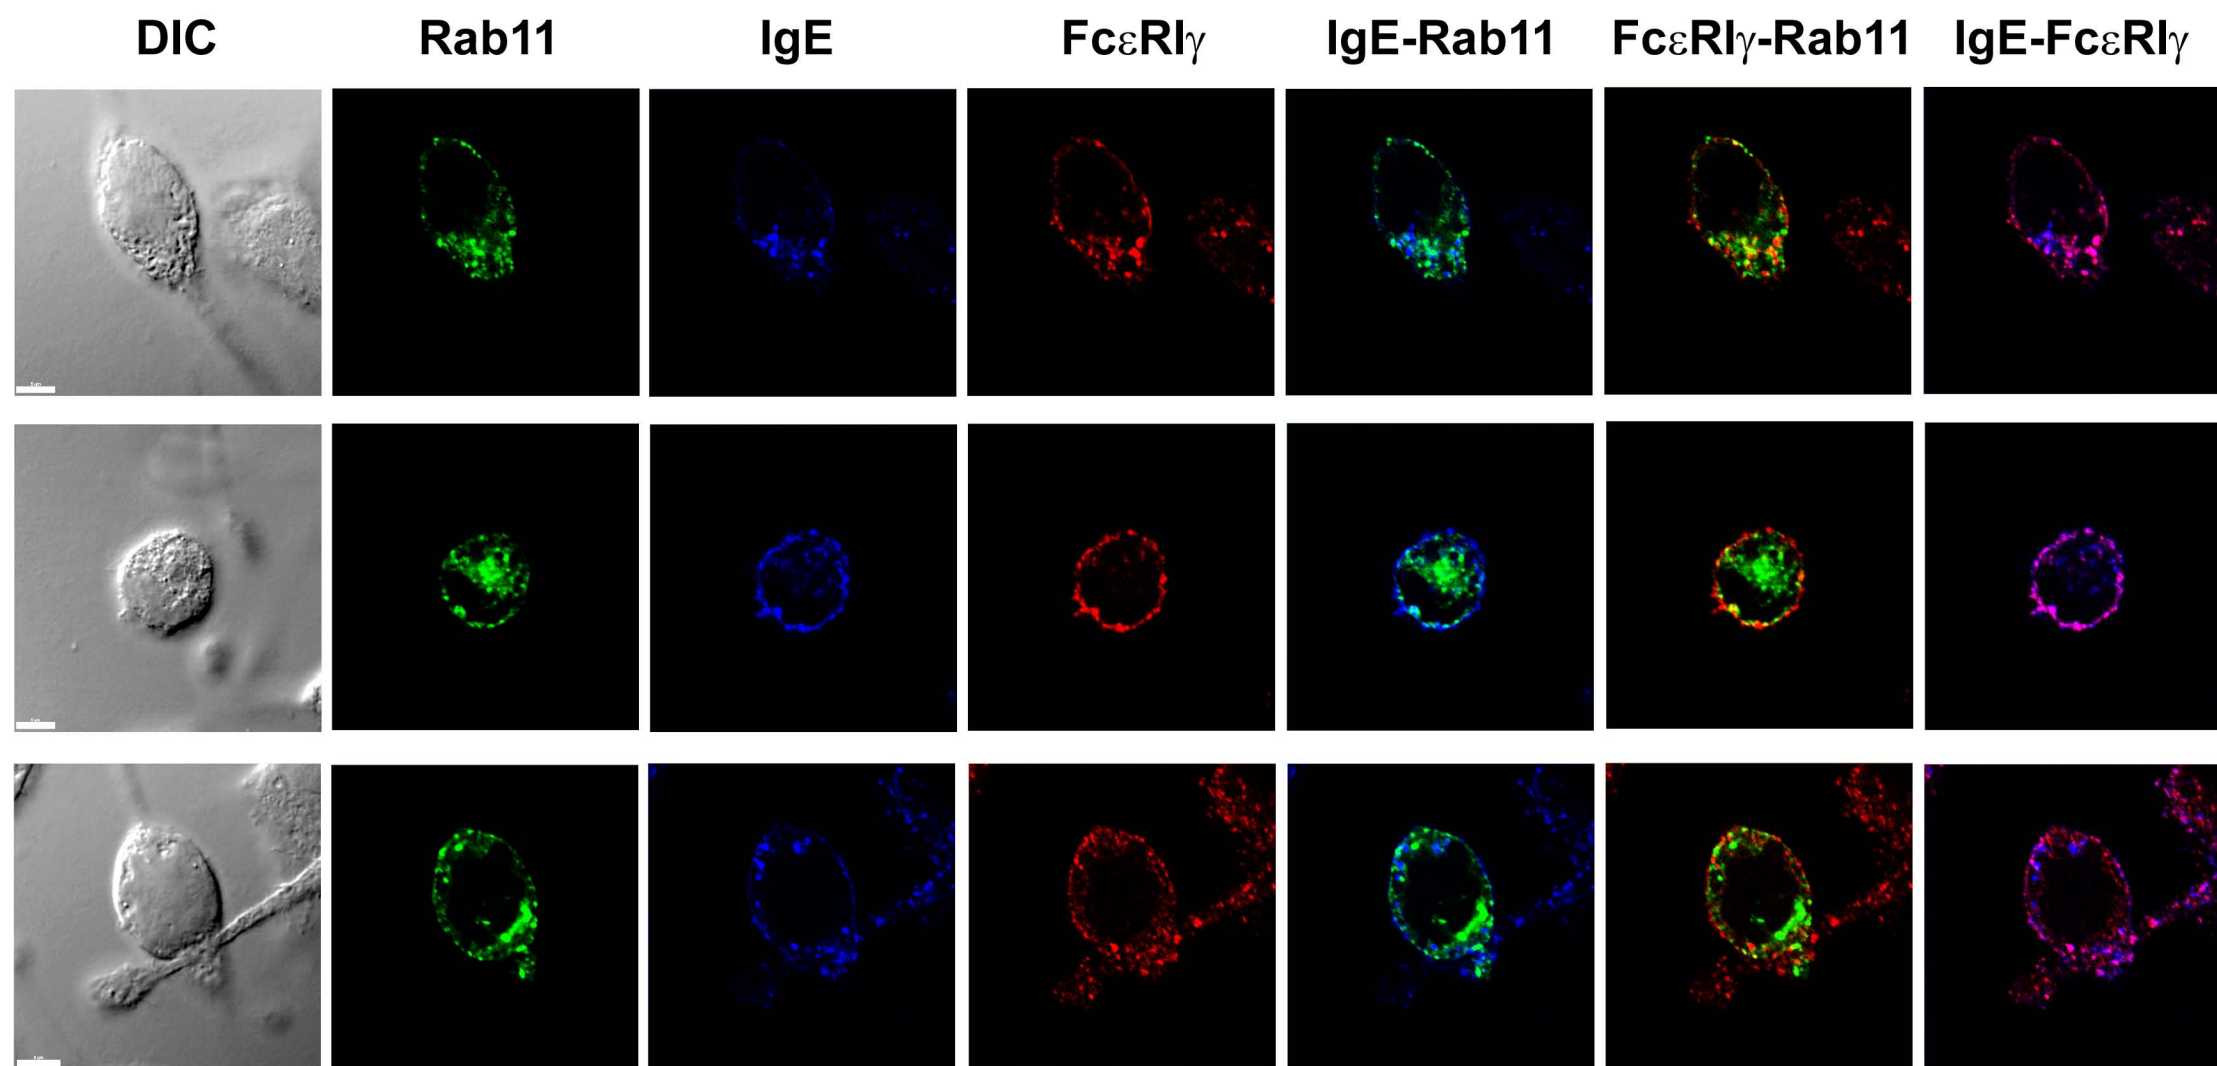

60 min

Figure S6

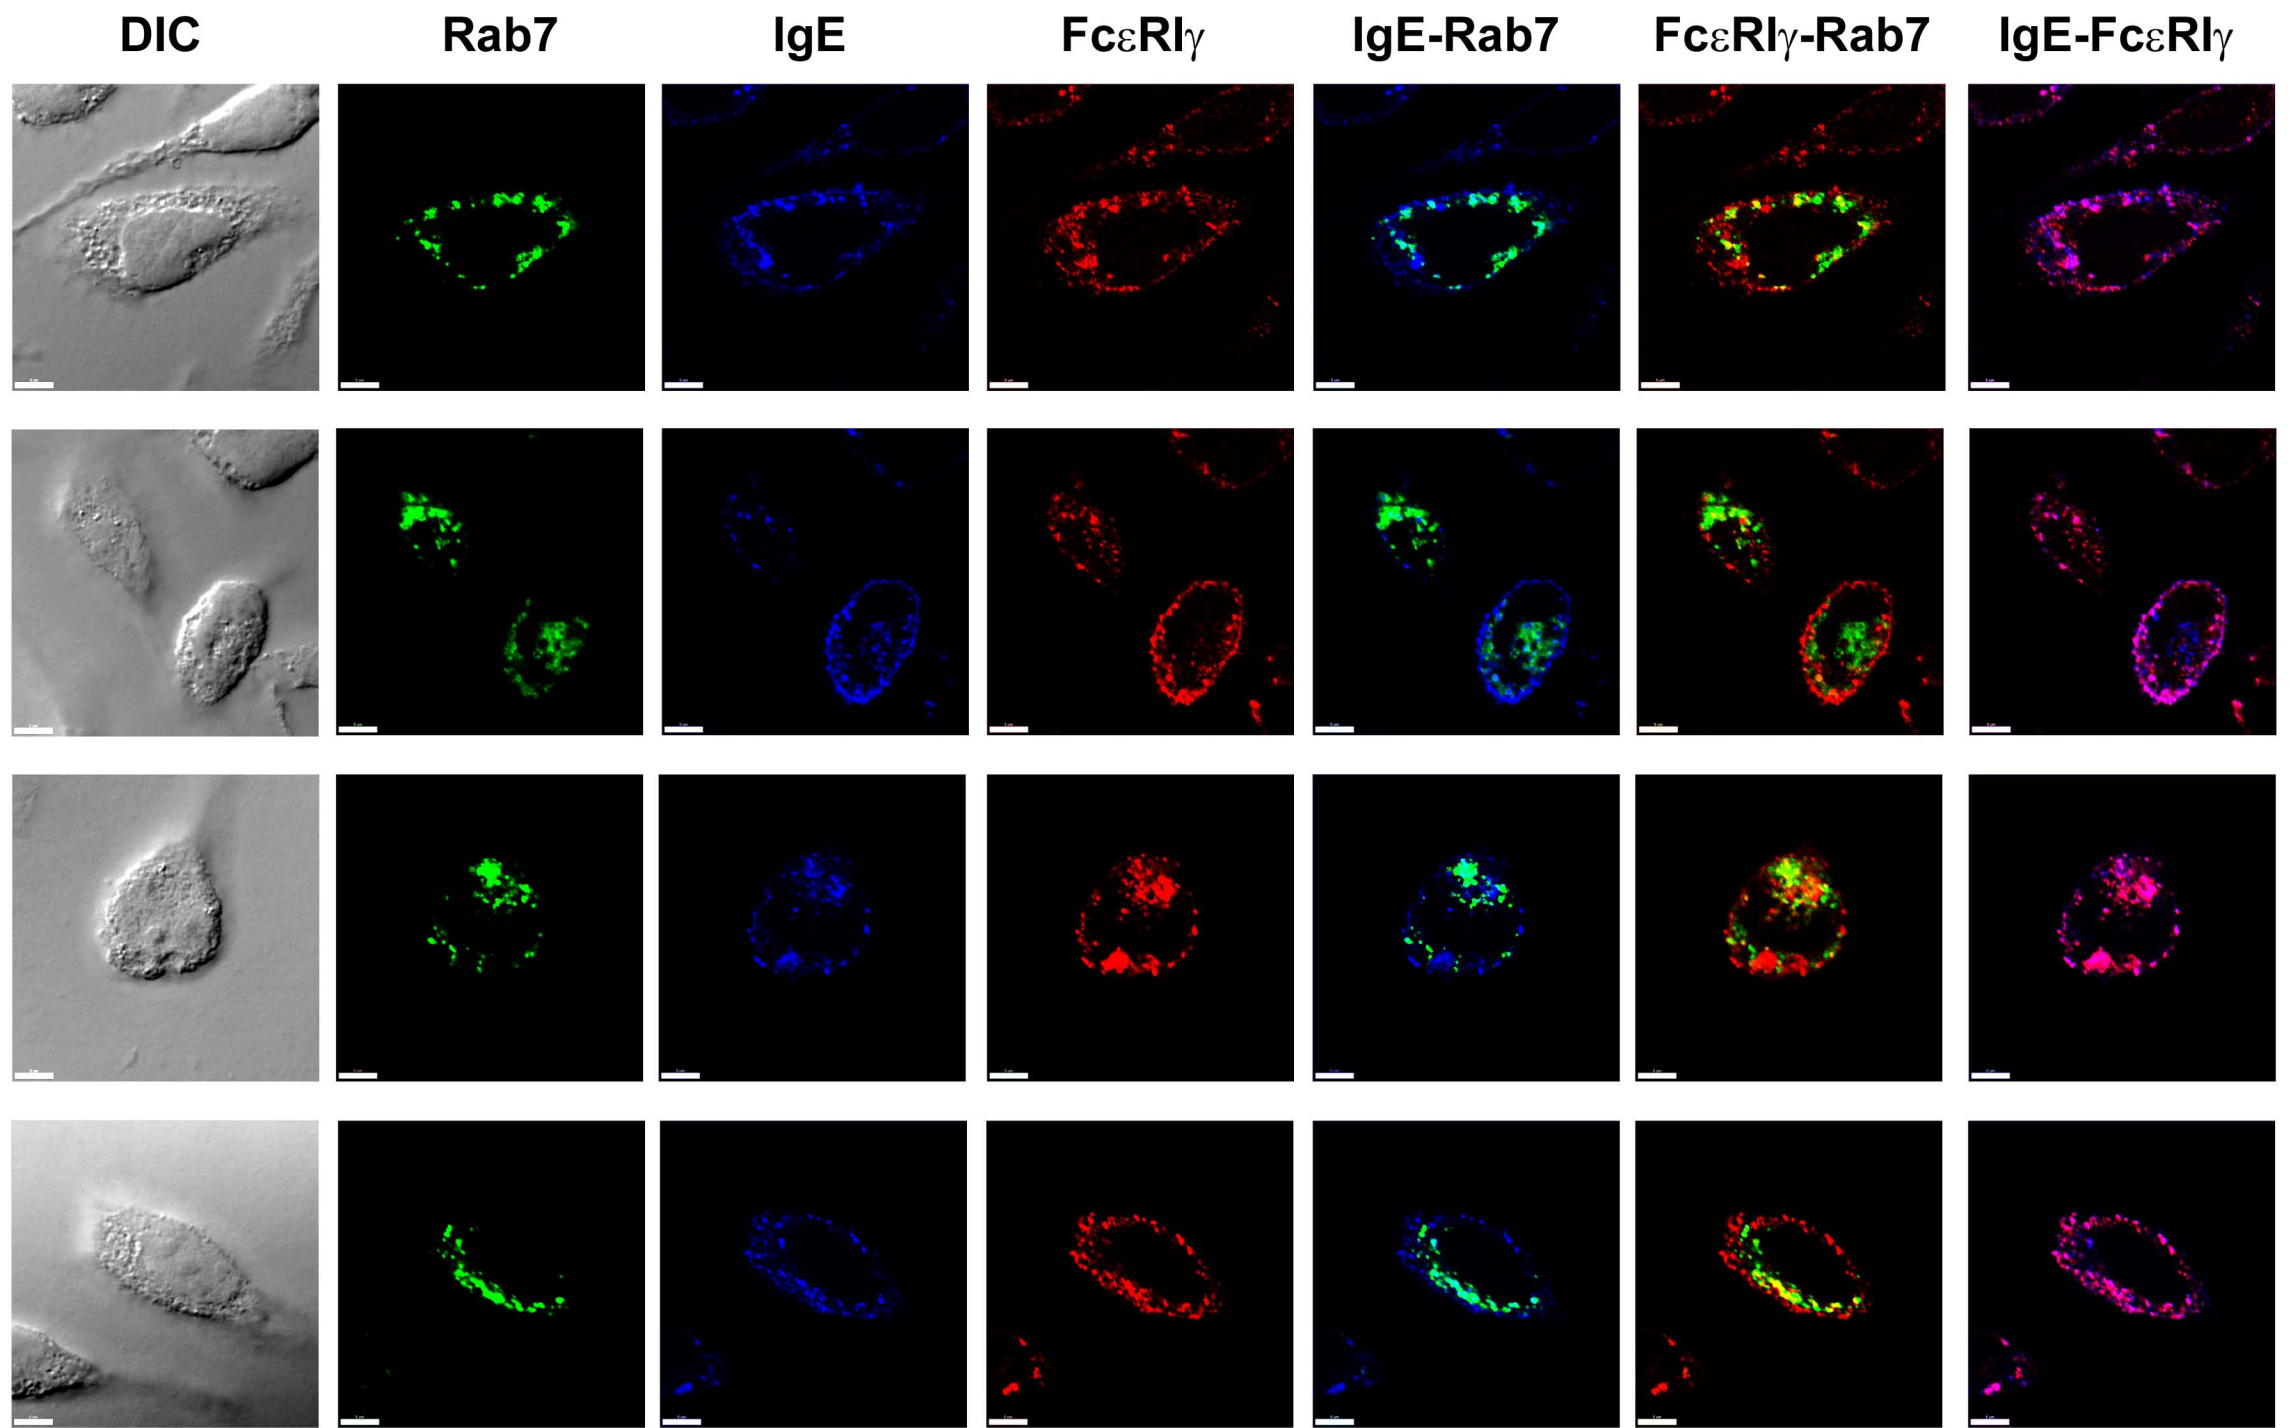

60 min

Figure S7A

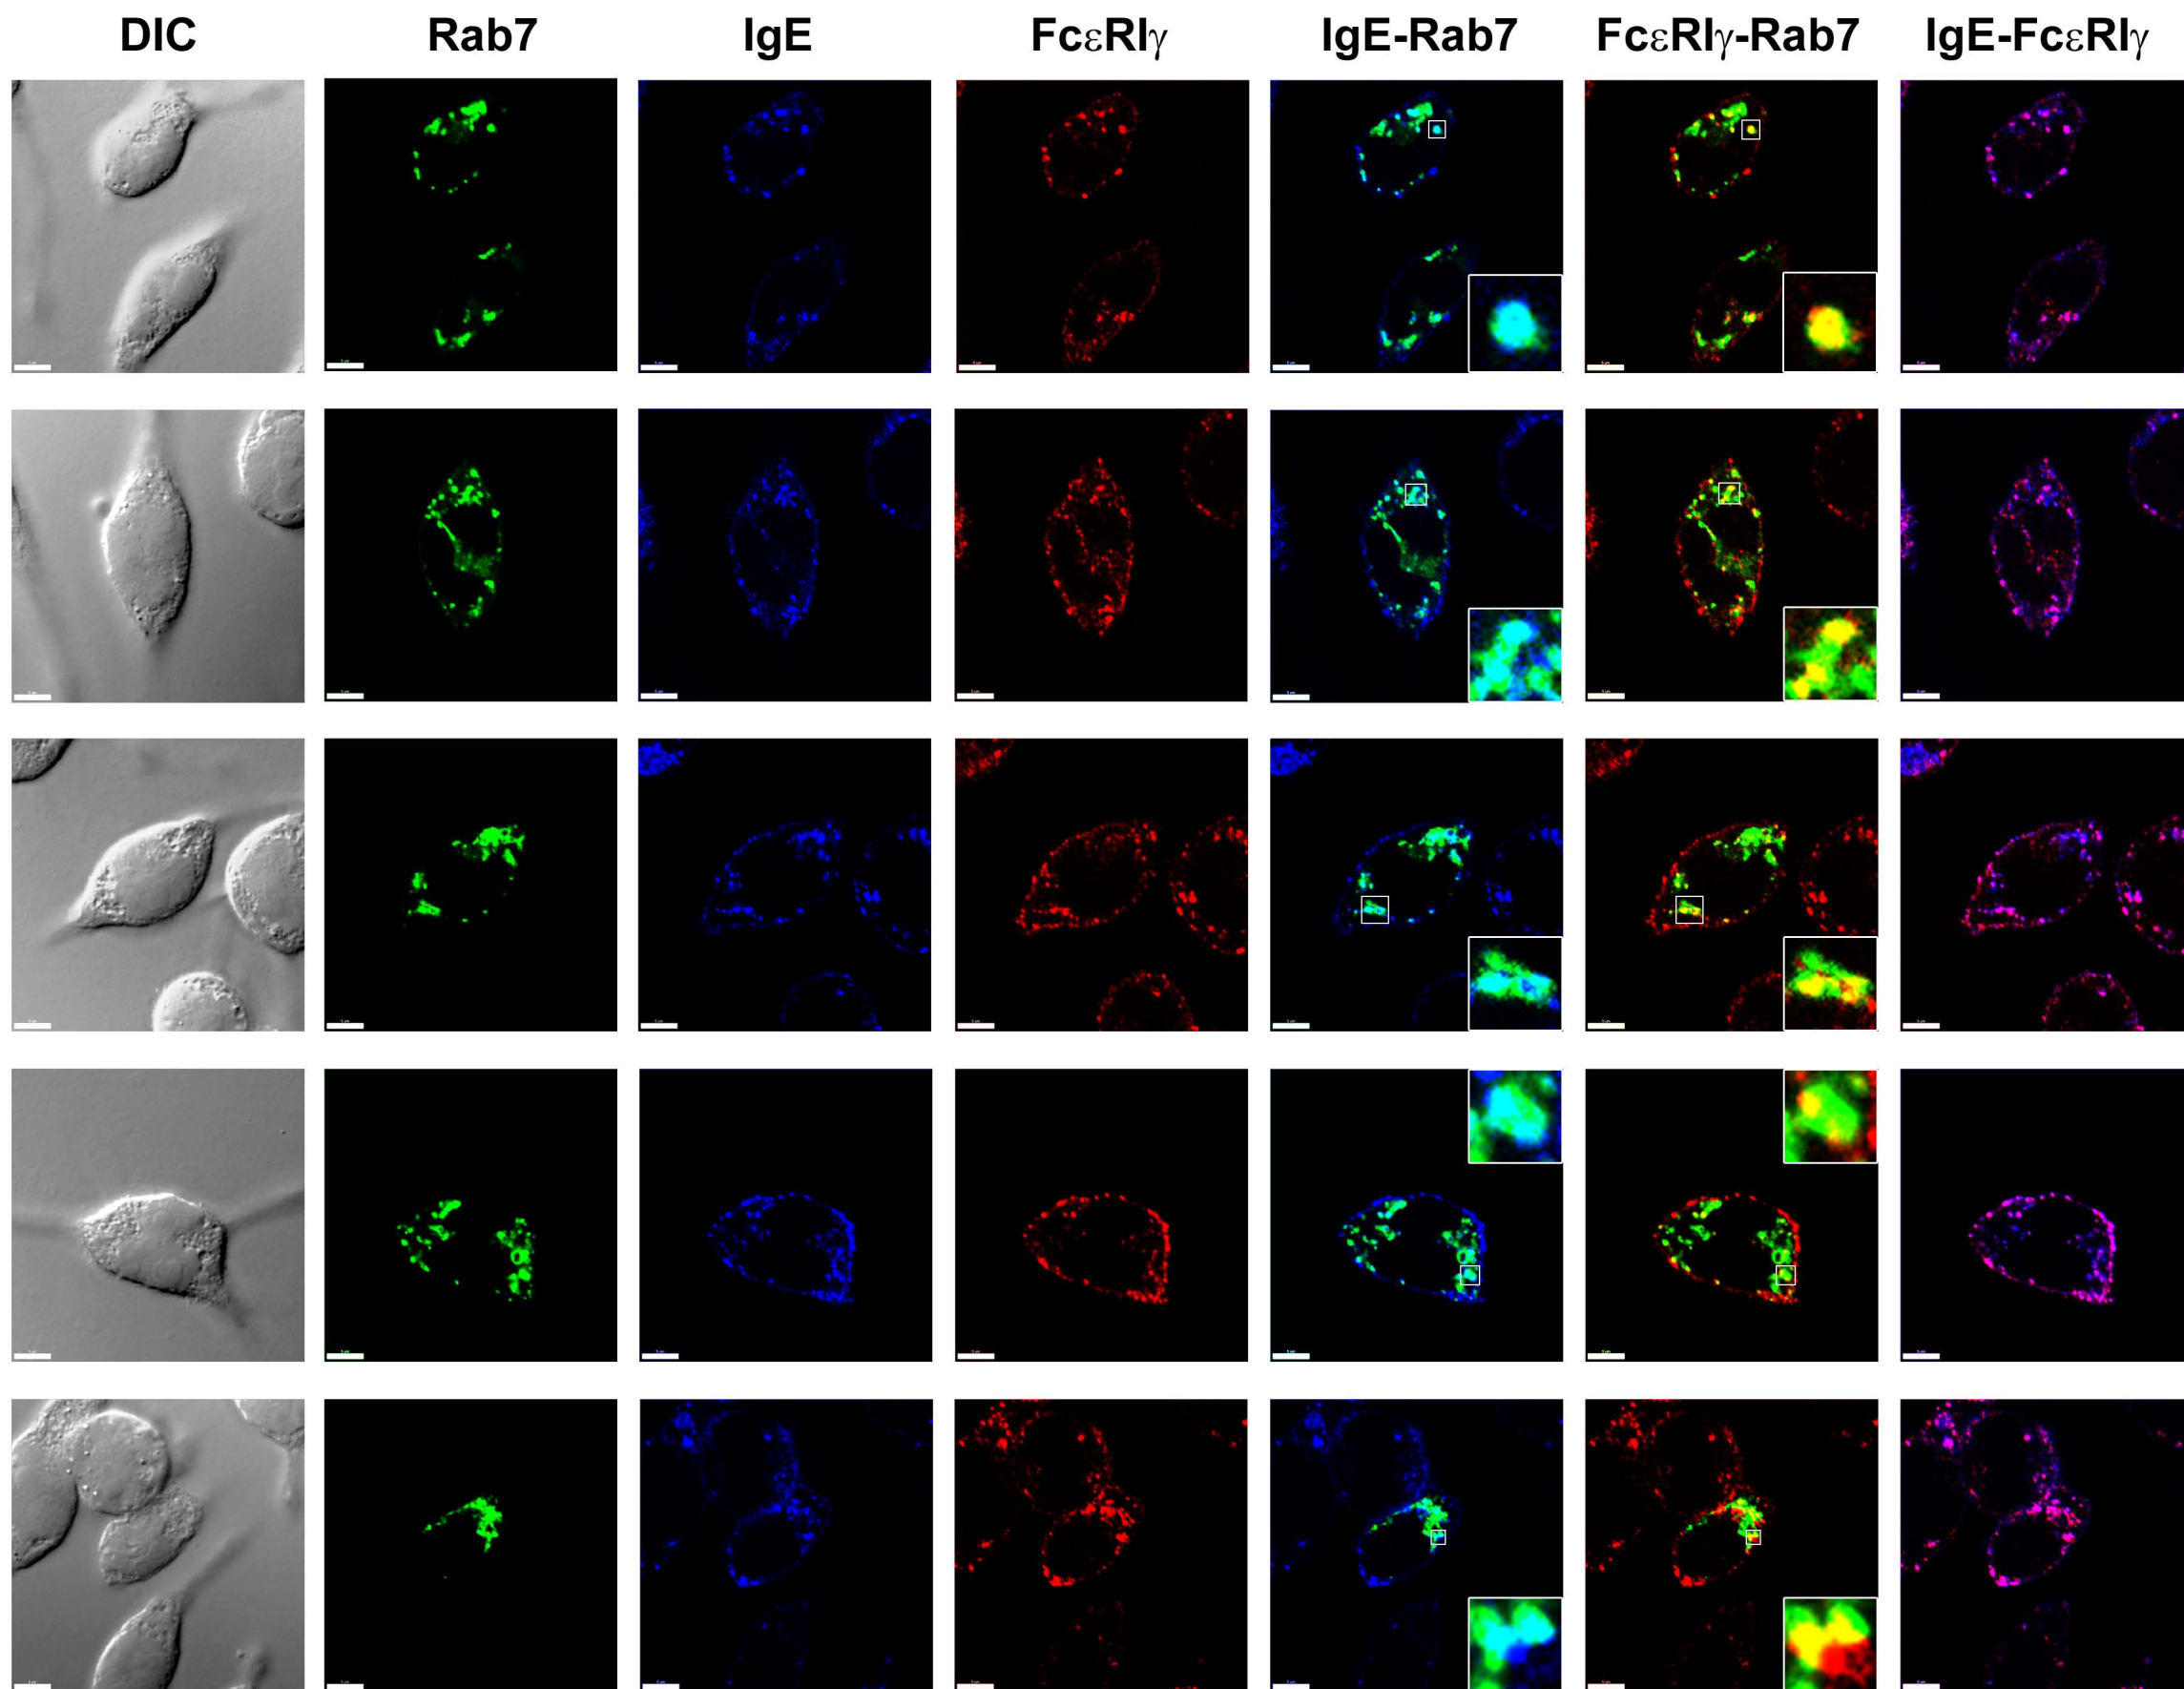

120 min

Figure S7B



**WT RBL**

**Syk<sup>-/-</sup> RBL**

**DIC**

**IgE - LAMP1**

**IgE - FcεR1γ**

**DIC**

**IgE - LAMP1**

**IgE - FcεR1γ**

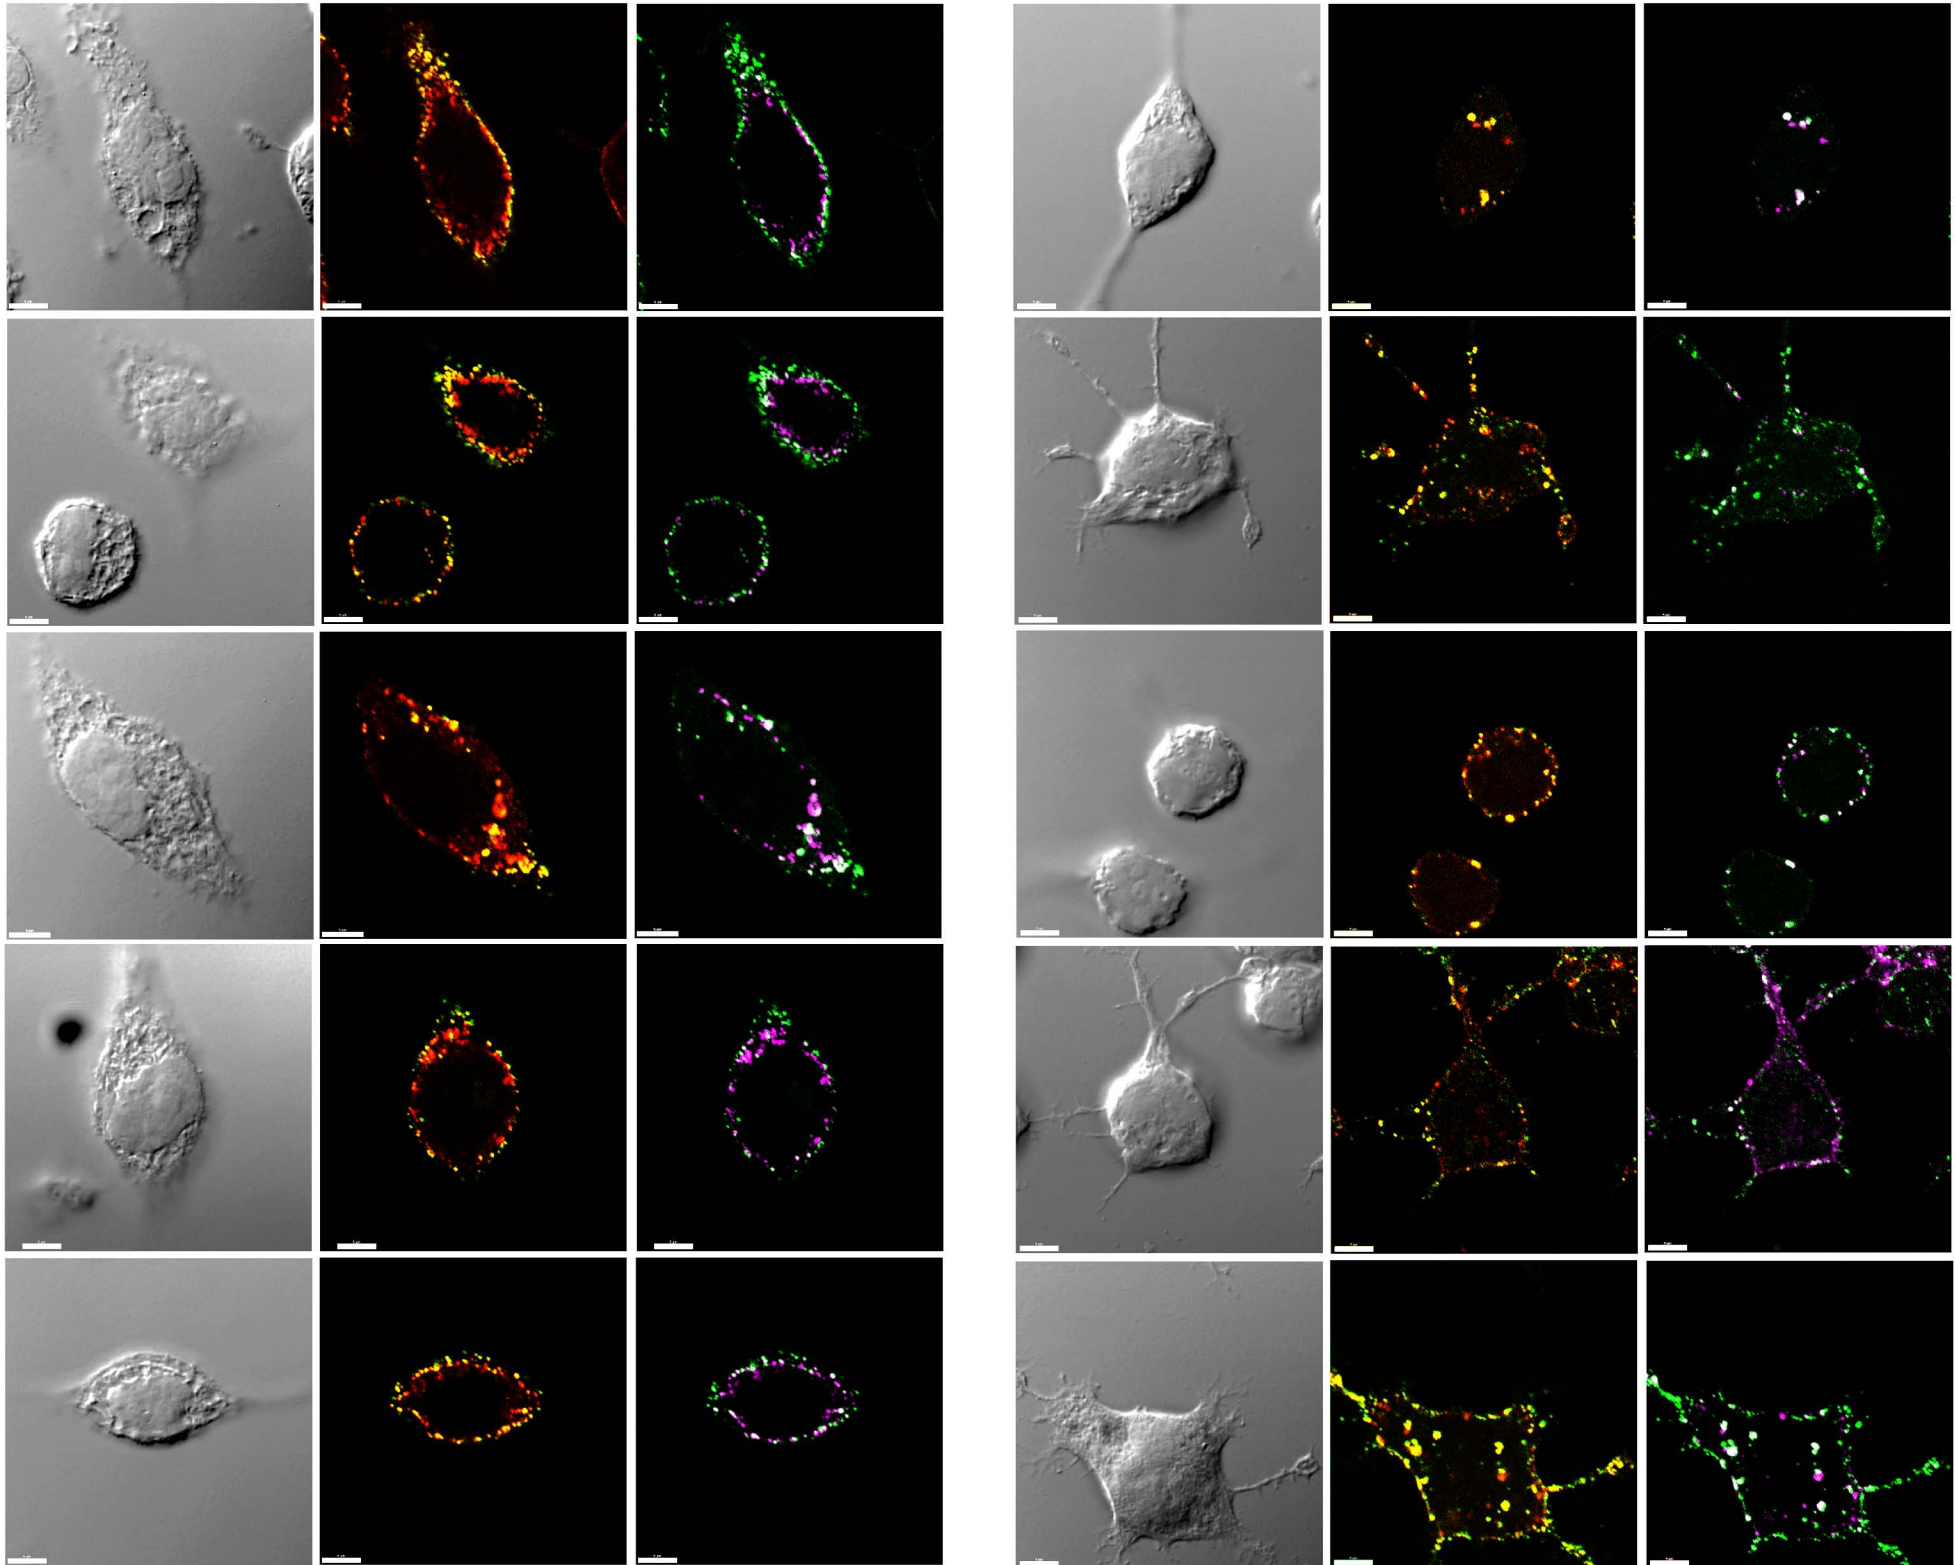

**30 min**

**Fig. S8**
